# Adaptive vaccination may be needed to extirpate COVID-19: Results from a runtime-alterable strain-drift and waning-immunity model

Wayne M. Getz<sup>1,2,3</sup>, Richard Salter<sup>3,4</sup>, Ludovica Luisa Vissat<sup>1</sup>,  
James S. Koopman<sup>5</sup>, Carl P. Simon<sup>6</sup>

<sup>1</sup>Dept. ESPM, UC Berkeley, CA 94720-3114, USA

<sup>2</sup>School of Mathematical Sciences, University of KwaZulu-Natal, South Africa

<sup>3</sup>Numerus, 850 Iron Point Rd., Folsom, CA 95630, USA

<sup>4</sup>Computer Science Dept., Oberlin College, Oberlin, Ohio, OH 44074, USA

<sup>5</sup>School of Public Health, University of Michigan, Ann Arbor, MI 48109, USA

<sup>6</sup>Gerald R. Ford School of Public Policy, University of Michigan, Ann Arbor, MI 48109, USA

**Corresponding Author:** Wayne M. Getz, [wgetz@berkeley.edu](mailto:wgetz@berkeley.edu)

**Author Contributions:** JSK and CPS initiated the project, provided feedback on early drafts and participated in discussions. WMG designed and formulated the SEIVD-IBM model, drafted the manuscript, ran simulations, and produced the figures. RS designed and built the J-RAMP platform and wrote the code and informational text. LLV checked all the mathematical equations and code. Both RS and LLV contributed to the structure of the manuscript. All authors contributed to editing and adding text as needed.

**Competing Interest Statements:** none

**Classification.** Major: Biological Sciences; Minor: Biophysics and Computational Biology

**Keywords:** SARS-CoV-2, SEIR models, multivalent vaccines, escape mutations, strain/variant proliferation

1 **Abstract**

2 We developed an elaborated susceptible-infected-recovered (SIR) individual-  
3 based model (IBM) with pathogen strain drift, waning and cross immunity,  
4 implemented as a novel Java Runtime-Alterable-Model Platform (J-RAMP).  
5 This platform allows parameter values, process formulations, and scriptable  
6 runtime drivers to be easily added at the start of simulation. It includes facility  
7 for integration into the R statistical and other data analysis platforms. We se-  
8 lected a set of parameter values and process descriptions relevant to the current  
9 COVID-19 pandemic. These include pathogen-specific shedding, environmen-  
10 tal persistence, host transmission and mortality, within-host pathogen mutation  
11 and replication, adaptive social distancing, and time dependent vaccine rate and  
12 strain valency specifications. Our simulations illustrate that if waning immu-  
13 nity outpaces vaccination rates, then vaccination rollouts may fail to contain the  
14 most transmissible strains. Our study highlights the need for adaptive vaccina-  
15 tion rollouts, which depend on reliable real-time monitoring and surveillance of  
16 strain proliferation and reinfection data needed to ensure that vaccines target  
17 emerging strains and constrain escape mutations. Together with such data, our  
18 platform has the potential to inform the design of vaccination programs that  
19 extirpate rather than exacerbate local outbreaks. Finally, our RAMP concept  
20 promotes the development of highly flexible models that can be easily shared  
21 among researchers and policymakers not only addressing healthcare crises, but  
22 other types of environmental crises as well.

23  
24 **Significance Statement:** Effective COVID-19 vaccine development has been  
25 unprecedented, but vaccinations are being delivered at contrasting rates across  
26 the globe. Here, using an innovative epidemiological Java runtime alterable  
27 modeling platform (J-RAMP), we demonstrate that seemingly reasonable vac-  
28 cination programs may exacerbate rather than mitigate regional outbreaks when  
29 immune waning outpaces vaccinations and reinfection promotes escape muta-  
30 tions. Our simulations suggest that adaptive vaccination programs, requiring  
31 adequate strain and serology monitoring and surveillance, are needed to extir-  
32 pate outbreaks. Our platform provides policymakers with an easy-to-use tool  
33 for designing effective vaccination programs. Our RAMP concept points the  
34 way to the development of highly flexible models that are easily shared among  
35 researchers and policymakers in all areas of systems analysis.

## 36 Introduction

37 Vaccines have either eliminated, or all but eliminated, diphtheria, measles, po-  
38 lio, rubella, small pox, and tetanus within developed countries, such as the  
39 USA [1]. The global COVID-19 pandemic has amply illustrated the overwhelm-  
40 ing economic importance that vaccines can play in bringing an epidemic un-  
41 der control [2]. Unlike the above mentioned diseases and more inline with in-  
42 fluenza, however, the SARS-CoV-2 pathogen may re-emerge with vengeance  
43 due both to waning immunity and proliferation of mutant strains or variants  
44 with increased transmissibility that escape both naturally-acquired and vaccine-  
45 induced immunity [3–8]. To investigate how effective vaccination programs may  
46 be in preventing future large-scale outbreaks of COVID-19 [9, 10], we built a  
47 Java Runtime-Alterable-Model Platform (J-RAMP) of an SEIVD (Susceptible,  
48 Exposed, Infectious, V=Immune & Vaccinated, Dead) individual-based model  
49 (IBM) [11–14] that includes the following processes (Fig. 1; see Materials and  
50 Methods, as well as Appendix A for details):

- 51 • pathogen strain-specific shedding [15], environmental persistence [16], with-  
52 host replication [17] and mortality rates [18] (some prefer the term variant  
53 rather than strain)
- 54 • immunological waning with strain cross immunity [6, 19]
- 55 • pathogen strain drift during transmission and within-host replication [20]
- 56 • an adaptive contact rate [21]
- 57 • a time-dependent, uni- or multivalent vaccine rollout [22, 23]

58 Our SEIVD-IBM J-RAMP, is an example of our novel runtime alterable-model  
59 platform (RAMP) concept, which includes panels, windows and sliders that al-  
60 low users to specify and manipulate model parameter values in real time, as well  
61 as modify process function descriptions, even during the course of a simulation,  
62 while protecting the integrity of the underlying code. Thus our SEIVD-IBM  
63 J-RAMP has epidemiological applications well beyond COVID-19, including  
64 diseases such as influenza [24], Ebola [25, 26], and any other directly transmit-  
65 ted disease [27]. To illustrate its application, we used our J-RAMP to explore  
66 the relative efficacy of uni- and multivalent vaccines applied at various time-  
67 dependent rates, where choice of valency may switch in response to realtime  
68 monitoring and surveillance data. Such adaptive vaccination programs may be  
69 required to combat the evolutionary arms race between vaccine efficacy and the  
70 evolution of new pathogen strains [20, 23, 28]. We demonstrate the possible con-  
71 sequences of vaccinating too few individuals in the context of the emergence of  
72 more transmissible strains, as well as the comparative efficacy of non-adaptive  
73 versus adaptive vaccines responsive in realtime to current strain valency. We  
74 simulate plausible COVID-19 outbreaks over a three year period in which vac-  
75 cination rollout commences at the start of year two and continues until the end  
76 of the year three.

77 Our study is meant to highlight issues related to vaccination rollout rates [10]  
78 and strain valency that may turn out to provide insufficient coverage of the pop-  
79 ulation or being outrun by waning immunity in vaccinated hosts or those that  
80 have survived COVID-19. We undertake these simulation with the knowledge  
81 that though a typical set of parameters may cover most outbreaks of COVID-19

82 in various regions around the world, regional differences in the contact behavior  
83 of individuals, with additional contact rate time dependency in each locality  
84 due to social distancing regulations and behavior, have led to markedly differ-  
85 ent outbreak patterns across regions [29–31]. Thus the result presented here are  
86 meant to inform us of potential pitfalls and dangers in rolling out inadequate  
87 vaccination programs and extract general principles, where possible, as well as  
88 illustrate an approach to its local application rather than prescribe a universal  
89 program: adaptive programs need to operate in response to local surveillance  
90 data and contact rate conditions.

91 The local nature of contact rate patterns is well established as an important  
92 driver of outbreak patterns [30]. The definition of a contact where transmission  
93 may occur is rather challenging though. Effective or “close” contact may be  
94 defined, as in [32], in terms of direct physical contact or close conversation, or it  
95 may involve concepts of a threshold distance and time period [33]. Taken a step  
96 further, it may relate to infectious dose levels and the relationship between dose  
97 and severity of the infection of individuals [34]. This effective contact rate issue,  
98 however, is side-stepped by fitting models to local incidence data to obtain a  
99 concatenated contact-and-transmission rate parameter value that best fits local  
100 outbreak patterns, as discussed in depth elsewhere [30].

101 Our results also suggest that adaptive vaccination programs that closely  
102 monitor the emergence of new strains and adapt vaccine valency to match pre-  
103 dominating strains are much more likely to extirpate local epidemics than non-  
104 adaptive policies, though our simulation results are greatly influenced by as-  
105 sumptions regarding rates of waning immunity and strain cross-immunity char-  
106 acteristics as well. Accurate forecasting of the future course of an epidemic in  
107 terms of strain composition and vaccination program efficacy require data on  
108 the rates at which immunity wanes, how such immunity depends on particu-  
109 lar strains, and the levels of cross immunity among strains [4, 6] that are more  
110 comprehensive than currently available. It also requires better data on within-  
111 host replication and mutation rates. Thus, in truth, we present our model  
112 and results fully aware that answers to questions relating the design of optimal  
113 region-specific vaccination programs await more reliable data on immunity pro-  
114 cesses, strain mutation rates [35], and the transmission potential and virulence  
115 of dominant strains [36]. We hope, however, that our results and subsequent  
116 investigations using our model provide the kinds of quantitative analyses that  
117 can help formulate highly effective local or country level vaccination programs  
118 that avoid many of the pitfalls revealed by our analysis, as well as encourage  
119 the adoption of rapidly adaptive vaccination programs.

## 120 Results

### 121 Single strain simulations

122 Our first simulation, which we regard as a “baseline run” has  $J = 0$  (i.e.,  
123 only one strain is possible), assumes a constant contact rate ( $\kappa(t) = \kappa_0$  for all  $t$ ;  
124 which implies no social distancing or effective contact reducing actions taken) in  
125 an a homogeneously, well-mixed population of ten thousand individuals ( $N_0 =$   
126 10,000), with an immune waning half-life of one year ( $t^{\text{half}} = 365$ ), and no  
127 vaccination rollout. The resulting simulation depicts a classic outbreak pattern



128 (Fig. 2) in which incidence rises to a peak of about 250 cases around 96 days  
129 after “patient zero” has been introduced, and then burns out around day 166  
130 days because an insufficient number of susceptible individuals are now available  
131 to keep the epidemic going. In the upper left-hand panel of our SEIVD-IBM  
132 J-RAMP dashboard in Fig. 2, we see that around 3/4 of individuals have been  
133 infected at the point where the epidemic burns out ( $V(166) = 7700$ , which is  
134 77% of  $N_0$ ): this suggests that herd immunity may well be in the ball park of  
135 75-80% (as supported by additional runs presented next), although this would  
136 be an underestimate if more transmissible strains come to prevail.

137 Repeated runs of this first simulation with different runtime seeds (viz., 10  
138 runs with runtime seeds ranging from 0 to , where each seed generates its own,  
139 essentially unique, but repeatedly sequence of pseudo random numbers; Fig. 2  
140 is for the case runtime seed = 0) produces the following means and standard  
141 deviations as a percentage of the population size (of S, V and D), as well as the  
142 length of the epidemic (days) (see Fig. C.1, Appendix C):  $S_{\text{fml}} = 21.9 \pm 0.6\%$ ,  
143  $V_{\text{fml}} = 76.4 \pm 0.6\%$ ,  $D_{\text{fml}} = 1.6 \pm 0.1\%$ , and  $t_{\text{fml}} = 167 \pm 9$  days. These results  
144 are almost the same when the initial population size is increased threefold to  
145  $N_0 = 30,000$  individuals, the primary difference being a small expected decrease  
146 in variability (around 1/3<sup>rd</sup> smaller) and slightly longer epidemic period (18%  
147 longer) (see Fig. C.1 for details). To obtain full plots of the incidence, prevalence,  
148 and daily-death trajectories from many runs of our SEIV-IBM, we exploited  
149 the R-platform integrability of our J-RAMP to generate mean and standard  
150 deviation plots of incidence, prevalence, and daily mortality, as described in  
151 Appendix B (and Fig. C.2).

152 Our second single-strain ( $J = 0$ ) simulation (Fig. 3A) illustrates that, for the  
153 selected set of parameter values, if the rate of waning is tripled from that of our  
154 first (i.e.,  $t^{\text{half}}$  is reduced from 365 days to 120 days) then herd immunity is still  
155 reached. Our third single strain simulation, however, shows that herd immunity  
156 is eluded for the selected set of parameter values when this rate is quadrupled  
157 ( $t^{\text{half}} = 90$  days; Fig. 3B): viz., the population enters a periodic outbreak mode  
158 because previously infected individuals are sufficiently susceptible after several  
159 months post-initial infection to be reinfected and thus keep the epidemic going.  
160 Herd immunity in this caricatured population (i.e., relatively small, isolated,  
161 homogeneous) would also be reached within a year if the waning immunity  
162 half-life is increased back to  $t^{\text{half}} = 180$ , but not if an adaptive contact rate  
163 is in operation (Fig. 3C & D;  $k(t)$  specified by Eq. A.10). More specifically,  
164 for the case  $p_I^{\text{half}} = 0.05$ , that is the “effective” contact rate  $\kappa(t)$  drops from  
165  $\kappa(t) = \kappa_0 = 4$  when  $I/N_0 = 0$  to  $\kappa(t) = \kappa_0/2 = 2$  when  $I(t)/N(t) = 0.05$ , our  
166 fourth single strain simulation indicates that prevalence peaks at roughly 400  
167 individuals (i.e., just around 0.4% of the population) around day 85 (Fig. 3C),  
168 drops to around 50 between days 210 and 240, and then rises back to over  
169 200 by the end of one year. In our fifth single strain simulation (Fig. 3D), an  
170 additional 5-fold reduction in our adaptive contact rate (i.e.,  $\kappa(t) = \kappa_0/2 = 2$   
171 when  $I(t)/N(t) = 0.01$ ) produces a prevalence of just under 100/10,000=0.01%  
172 that appears to persist with stochastic noise from day 100 onwards.

173 We carried out two additional single strain simulations, this time for three  
174 years, and applied a vaccination rollout program that vaccinated individuals  
175 drawn at random in the second and third year at rates  $v = 0.001$  and  $v =$

176 0.002 (0.1% and 0.2% of the population vaccinated each day; Fig. 4A & B),  
177 respectively, from a pool consisting of individuals not currently infectious or  
178 previously vaccinated. In these runs, we set  $t^{\text{half}} = 365$  days,  $p_1^{\text{half}} = 0.002$   
179 (reflecting US case percentages after 1 year), with a population size of  $N_0 =$   
180 100,000. In the case  $v = 0.001$ , the vaccination rate was insufficient to overcome  
181 the rate at which infected individuals were becoming reinfected due to waning  
182 immunity. In the case  $v = 0.002$ , the vaccination rate was sufficiently high to  
183 bring the epidemic under control. In the latter case, however, if we no longer  
184 allow individuals who had previously been infected to be part of the vaccination  
185 pool as well (i.e. we confine vaccinations to the **S** class only), the vaccination  
186 rollout rate  $v = 0.002$  is now insufficient to extinguish the outbreak and a  
187 resurgence occurs around the end of the second year (Fig. 4C).

### 188 Multi-strain simulations

189 In all our multi-strain simulations we set  $p_1^{\text{half}} = 0.005$ . This latter value, as  
190 previously mentioned, produces a cumulative number of cases of around 10%  
191 in the first year in a population of size  $N_0 = 100,000$  (Appendix C, Fig. C.3),  
192 which is in the ballpark of 8.5% for the US outbreak during its first year.

193 In our first set of multistrain simulations, we set  $J = 4$  (i.e., permitting  
194 16 strains) and compared the situations where cross immunity is absent ( $c = 0$ ;  
195 Fig. 5A) to where it has the intermediate value  $c = 0.5$  (Fig. 5B). The remaining  
196 parameters were the same for all strains and used the same basic epidemiological  
197 parameters, as in our previous single strain simulations, although mutation rates  
198 were now added to enable new strains to proliferate (see caption to Fig. 5 for  
199 details on parameter values).

200 In the no cross immunity (Fig. 5A) case, we see that the initial surge is  
201 driven by strain 0  $\equiv (0, 0, 0, 0)$  (see discussion in Appendix A for use of binary  
202 representation), which is first replaced by strain 8  $\equiv (1, 0, 0, 0)$  around the end  
203 of year 1, which in turn is somewhat displaced by strains 7  $\equiv (0, 1, 1, 1)$  and  
204 6  $\equiv (0, 1, 1, 0)$ , with strain 1  $\equiv (0, 0, 0, 1)$  coming to dominate at the start of year  
205 3, only to be finally challenged by strain 3  $\equiv (0, 0, 1, 1)$  towards the end of year  
206 3. In the nearest-neighbor cross immunity case (Fig. 5B), given the retarding  
207 effect of cross immunity on the proliferation of strains that differ in only one  
208 allele from the initial dominating strain 0  $\equiv (0, 0, 0, 0)$ , this initial strain was  
209 displaced by strains 3  $\equiv (0, 0, 1, 1)$  and 11  $\equiv (1, 0, 1, 1)$  around the end of year  
210 1. These latter 2 strains were then displaced by strain 7  $\equiv (0, 1, 1, 0)$  during the  
211 first half of year 3, with strain 13  $\equiv (1, 1, 0, 1)$  dominating at the end of year 3  
212 somewhat supported at a lower level by strain 14  $\equiv (1, 1, 1, 0)$ . We also noticed  
213 a moderate resurgence of strain 0  $\equiv (0, 0, 0, 0)$  in the middle of year 3.

214 In a second set of multistrain simulations, we set  $J = 7$  for a total of 128  
215 possible strains. Unlike the previous set of multistrain simulations, we now  
216 provided a strain specific set of transmission parameters  $\bar{\beta}_j$  by selecting these at  
217 random on the interval  $[0, 0.3]$ , apart from a dominant sequence of transmission  
218 values that steps in increments of 0.25 from 0.3 in strain 0 to 0.475 in strain  
219 127 along the sequence mentioned in the caption to Fig. 6 and documented  
220 in Fig. C.4. The remaining parameters are the same as for the simulation  
221 depicted in Fig. 5B (i.e., the cross-immunity parameter  $c = 0.5$ ). Unlike the

222 case,  $J = 4$ , only two strains now played any serious role in the outbreak in the  
223 non-vaccination scenario (Fig. 6A): strain 0  $\equiv (0, 0, 0, 0, 0, 0, 0)$  for the first year  
224 and strain 127  $\equiv (1, 1, 1, 1, 1, 1, 1)$ , the most transmissible, for the remaining 2  
225 years.

## 226 Vaccination rollout simulations

227 Following our no-vaccination simulation of our 128-strain case (Case A; Fig. 6A),  
228 we explored three different vaccination rollout programs applied in years 2 and  
229 3 with the following vaccination rates and vaccine strain valencies: Case B, rate  
230  $v = 0.002$  (i.e., 0.2% vaccinated per day), strain valency 0 (Fig. 6B); Case C, rate  
231  $v = 0.002$ , strain valency 127 (Fig. 6C); and Case D,  $v = 0.01$ , strain valency  
232  $(0, 7, 31, 127)$  (Fig. 6D). Each of these vaccination programs begin with the initial  
233 strain 0  $\equiv (0, 0, 0, 0, 0, 0, 0)$  being replaced by strain 127  $\equiv (1, 1, 1, 1, 1, 1, 1)$   
234 towards the end of year 1 or start of year 2.

235 Alarming, the first vaccination rollout scenario (Case B) made the epi-  
236 demic worse rather than better when compared with the no vaccination scenario  
237 (number of deaths were 1366 versus 1122; compare Figs. 6A and B) because the  
238 vaccination rollout with its strain 0 valence vaccine, though delaying the emer-  
239 gence of strain 127, led to an increased prevalence of this most transmissible  
240 strain ( $\beta_{127} = 0.475$  versus  $\beta_0 = 0.300$ ). Using a strain 127 valence vacci-  
241 nation (Case C) had some effect in reducing the 3-year death total back to  
242 1109, but the efficacy of this rollout was thwarted by the emergence of strain  
243 48  $\equiv (0, 1, 1, 0, 0, 0, 0)$  ( $\beta_{48} = 0.295$ , Fig. 6C).

244 Given the inability of these two monovalent vaccination rollout programs in  
245 years 2 and 3 to control the outbreak, we simulated the much more aggressive  
246 rollout program of a quadravalent  $(0, 7, 31, 127)$  vaccine applied at a rate of 1% per  
247 day ( $v = 0.01$ ; a five-fold increase over the previous two monovalent programs)  
248 in a system with increased levels of cross immunity (cascading versus simple)  
249 and including revaccination of previously vaccinated individuals to combat the  
250 effects of waning immunity. Even this aggressive vaccination rollout program  
251 failed, although it did knock the incidence way down at the start of the rollout.  
252 The efficacy of this rollout, however, was thwarted by the rise of strain 23  $\equiv$   
253  $(0, 0, 1, 0, 1, 1, 1)$  ( $\beta_{23} = 0.214$ ) during the mid to latter part of the second year,  
254 which was then supplanted by strain 3  $\equiv (0, 0, 0, 0, 0, 1, 1)$  ( $\beta_3 = 0.350$ ), which  
255 dominated the third year (Fig. 6D).

256 Unsurprisingly, the success of any vaccination program depends on the rela-  
257 tive robustness of the immunity characteristics of hosts to the various strains.  
258 Thus, in regard to the vaccination programs represented by cases B and C  
259 (Fig. 6, we simulated the rollout of a bivalent vaccine with strain valency  $(0, 127)$   
260 implemented at the same vaccination rate of  $v = 0.002$ , but in a system with  
261 much more robust immunity characteristics: a waning half-life increased from  
262  $t^{\text{half}} = 365$  to 1825 days (a five-fold increase) and a cascading cross immunity  
263 system with  $c$  increased from 0.5 to 0.9. In this case, the outbreak was rapidly  
264 extirpated after 257 days (i.e., from start at day 365 to extirpation at day 622).

265 Given the failure of our first three 128 strain vaccination rollouts (cases B  
266 to D in Fig. 6) to extirpate the simulated epidemics, we investigated whether  
267 rollout programs that adapted vaccine valencies to track in real time the emer-

268 gence of dominant strains might be more effective. Thus, we used a JS scripting  
269 window to write a JavaScript driver (as described in Appendix B; see Fig. B.4)  
270 that adapted (i.e., switched as necessary) the valency of the vaccine every 90  
271 days after the start of the vaccination rollout to match the top two strains  
272 prevalent at time of switching, or only the top strain if no other strain exceeded  
273 a prevalence of 10 individuals. The results of these two simulations, one for the  
274 nearest-neighbor cross-immunity case (Eq. 1) and one for the cascading cross-  
275 immunity case (Eq. A.7), are provided in Fig. 7. They should be compared  
276 with the non-vaccination case depicted in Fig. 6A and the non adaptive vac-  
277 cination rollout depicted in Fig. 6D. In contrast with the latter—and despite  
278 having the same vaccination rates, the same strategies for selecting non-infected  
279 individuals at random, and employing vaccines with fewer strain valency—both  
280 of these adaptive vaccination rollouts extirpated the epidemic, the first within  
281 half a year (Case A) and the second within 1.4 years (Case B) from the start of  
282 vaccination rollout.

## 283 Discussion

284 The amount of structure and data needed in complex biological systems' mod-  
285 els, depends on the questions that these models have been formulated to ad-  
286 dress [26,37]. In this paper, we steered away from making specific predictions—  
287 because universal solutions are not always locally applicable. Rather, we focused  
288 on questions relating to the potential efficacy of different vaccination rollouts  
289 (both vaccination rates and valencies of vaccines) in the context of strain emer-  
290 gence and the potential for vaccination programs to go awry. To make specific  
291 predictions requires localized data, particularly as it may relate to social dis-  
292 tancing behavior or other factors that affect contact rates over time [30,38,39].  
293 Additionally, we cannot expect models to make strain-specific informative pre-  
294 dictions, unless they have been designed to do so and are supported by location  
295 specific data regarding the relative transmissibility of strains and other strain  
296 specific data. In the absence of such data, models become a tool for anticipat-  
297 ing pitfalls and avoiding unintended consequences of well-intentioned actions.  
298 Equally important, however, is the implementation of our model as a RAMP  
299 (runtime alterable model platform), because this greatly facilitates the use of  
300 our model by ourselves and others in testing out different hypothesis about the  
301 process generating observed population level strain transmission dynamics.

302 The illustrative simulations we present demonstrate that if vaccination roll-  
303 out rates and vaccine valencies are applied in blanket manner—that is, without  
304 monitoring strain emergence and obtaining some assessment of the epidemio-  
305 logical characteristics of those strains (e.g., relative transmissibility, virulence,  
306 waning and cross immunity characteristics)—then the possibility exists for a  
307 vaccination program to do more harm than good. This of course, is not to say  
308 that vaccination programs should ever be avoided; only that once a vaccination  
309 program is embarked upon, it should be implemented at a sufficiently vigorous  
310 rate to ensure that it is not outrun by relatively fast waning immunity rates.  
311 Additionally, when escape mutations emerge, generally associated with reinfec-  
312 tion cases [8], then the valency of vaccines should be switched rapidly enough to

313 thwart escape mutations, rather than aiding such mutations by thwarting less  
314 transmissible competing strains instead.

315 At this time, the primary value of our SEIVD-IBM J-RAMP is in testing var-  
316 ious vaccination strategies as they relate to strain emergence [40] and identifying  
317 pitfalls related to the unintended promotion of more transmissible or virulent  
318 strains. Strain emergence has both a local and global component. Particu-  
319 lar strains may first be identified as occurring in specific geographical regions,  
320 as in the strains that appear to have originated in the UK (B.1.7.7 variant),  
321 South Africa (variants B.1.1.54, B.1.1.56 and the C.1 lineage) and Brazil (P.1  
322 lineage) [41]. Thus more geographically focused application of our J-RAMP  
323 may require more specific strain related information. Such information would  
324 then be used to get estimates of the relative values of transmissibility  $\beta_j$ , viru-  
325 lence  $\alpha_j$ , and even of shedding ( $\bar{\zeta}_{jm}$ ) and environmental persistence ( $\bar{\eta}_j$ ). But  
326 equally important in evaluating the impacts of vaccination strategies on local  
327 outbreaks is obtaining strain-specific cross-immunity data (for characterization  
328 of the elements  $c_{j\ell}$  of the cross immunity matrix  $\mathbf{C}$ ), waning rates (which we  
329 have not made strain specific, but our model could be generalized to include  
330 strain specific values  $t_j^{\text{half}}$ ), and the relative within host competition values (i.e.,  
331  $\lambda_j$ , which we have set all equal to 1 at this time in the absence of data to the  
332 contrary). Models are sorely needed to explore multistrain dynamics, particu-  
333 larly the epidemiological properties with regard to shedding, environmental  
334 persistence, transmission, mutation, and within-host replication rates, which  
335 acting together determine the relative success of different strains and their ac-  
336 tual impact on the severity of epidemics and the nature of vaccination programs  
337 needed to suppress them.

338 The process of making our model both location and strain specific could be  
339 undertaken using methods designed to enhance the relevancy of models, such  
340 as Appropriate Complexity Modeling (ACM: [26,37]). Further, in some cases it  
341 may be useful to add spatial or age-structure information to our SEIVD model  
342 IBMs or include a contact network [42], which itself may contain spatial or re-  
343 fined class category (e.g. age or work category) information. In addition, our  
344 current implementation represents strain differences in terms of  $J$  loci with two  
345 alleles (denoted by 0 and 1 respectively) at each locus. A more realistic repre-  
346 sentation of the genetic basis of strain differences may involve a more involved  
347 genetic representation in which several alleles are possible at each locus.

348 Although cross-immunity and immune waning are entangled in our immu-  
349 nity modifier functions (i.e.,  $\phi_{ij}$ ; see Eq. A.11), cross-neutralization data can  
350 be used to estimate the cross and waning immunity parameters using appro-  
351 priate methods [43,44]. Such data are becoming more widely available through  
352 the application of rapid PCR methods [3,45,46]. Strain or variant cross neu-  
353 tralizing studies bring up a much neglected issue, which is the effect of dose  
354 (number of pathogens involved in the initial infection, also know as viral load)  
355 on the severity of the infection. This differs from the questions of the number  
356 of doses—usually one or two—constituting and vaccine regimen versus the viral  
357 load (or antigen load, or virus-like particle load when only antigens or parts of  
358 viruses are administered) in each dose [4]. In the context of vaccination, both  
359 these issues and the technology used to produce the vaccine [23] may well have  
360 an impact on waning immunity half-lives and cross-immunity values. Thus,

361 the parameter values used in the model should ultimately be vaccine specific.  
362 Further, when it comes to determining waning and cross immunity paramete-  
363 ter values, our model does not distinguish between individuals that have been  
364 infected with a particular strain or vaccinated with a valency related to that  
365 strain.

366 In the coming year, as we obtain more information on the nature of immunity  
367 to SARS-CoV-2, it will become more apparent to us whether or not COVID-19  
368 will settle into global endemicity [19, 47]. If this is the case, then constant vigi-  
369 lance and a well designed vaccination program with respect to vaccinating the  
370 young and implementing booster vaccinations with appropriate strain valency  
371 will become the order of the day. The J-RAMP presented here, with appropri-  
372 ate elaborations that will become evident through its future application, such as  
373 being able to compute the best time to administer booster shots of the same or  
374 different strain valencies to individuals, should play a decisive role in the ratio-  
375 nal design of effective and efficient COVID-19 vaccination programs worldwide.  
376 This is made apparent from the simulations we present here that, depending on  
377 the immunological characteristics of hosts and mutational rates of SARS-Cov-  
378 2, it may be harder than currently anticipated to extinguish COVID-19 in the  
379 next few years through non-adaptive vaccination programs. Thus, we should  
380 endeavor to adapt the strain valency of our vaccines as rapidly as possible to  
381 the predominating SARS-Cov-2 strains, identified from ongoing monitoring and  
382 surveillance programs.

383 Finally, the concept of runtime-alterable, modeling platforms (RAMPs),  
384 with driver script and other coding platform integration, in our case devel-  
385 oped in Java with R platform integration and a JavaScript simulation driver  
386 window, provides the first example of a new concept in model implementation  
387 that facilitates model sharing and easy modification by users other than the  
388 original developers. We believe such platforms can come to play an important  
389 role not only in disease modeling, but in all fields of research that rely on models  
390 for comprehensive analyses of the behavior of systems of interest.

## 391 **Materials and Methods**

### 392 **Our SEIVD-IBM in a nutshell**

393 We constructed an individual-based model (IBM) of a susceptible-exposed-  
394 infectious-recovered (i.e., an SEIVD model, where removed R are split into  
395  $V$ =immune/vaccinated, and  $D$ =dead) epidemiological process [11, 12] in a ho-  
396 mogeneous population with a random encounter contact rate parameter  $\kappa_0 > 0$ .  
397 Our formulation includes a host immunological waning process [6, 19]. It also  
398 includes the emergence of pathogen strains due to a mutational process that  
399 impacts both transmission of mutant strains from the infectee and genetic  
400 drift [3, 5, 48] of strains within the infector, with rates impacted by cross im-  
401 munity effects. We allowed for variation in pathogen strain transmissibility  
402 (i.e., in the  $\beta > 0$  parameter of the frequency dependent transmission function  
403  $\beta SI/N$  [49, 50]) and pathogen virulence as represented by the disease-induced  
404 host mortality rate sensu Anderson and May [51] (and often represented by a  
405 parameter  $\alpha \geq 0$  [49]).



406 The detailed formulation of our model and its algorithmic implementation  
407 is provided in Appendix A. In a nutshell we:

- 408 1. defined a set of  $2^J$  pathogen strains (user selected value for  $J$  ranging from  
409 0 to 8; pathogen index  $j = 0, \dots, 2^J - 1$ ) with a genetic-relatedness topology  
410 of a  $J$ -dimensional unit cube—i.e., each pathogen has  $J$ -loci that can take  
411 on one of two allelic values at each locus with immediate neighboring  
412 strains differing from each other by exactly one allelic value (0 or 1) at  
413 only one of the  $J$  loci
- 414 2. defined a population of  $N_0$  hosts as belonging at time  $t$  to either an epi-  
415 demologically naïve set of susceptible individuals  $\mathbf{S}$  of size  $N_S(t)$ , a set  
416  $\mathbf{A}$  of  $N_A(t)$  identified agents  $A_i$  ( $i = 1, \dots, N_A(t)$ ) whose epidemiological  
417 histories are known, or a set  $\mathbf{D}$  of  $N_D(t)$  individuals that have died from  
418 the disease
- 419 3. allow pathogen strain-specific transmission “force” ( $\bar{\beta}_j > 0$ ) and virulence  
420 ( $\alpha_j \geq 0$ ) parameters to vary in value among one another within a defined  
421 range  $\bar{\beta}_j \in [\beta_{\min}, \beta_{\max}]$  and  $\alpha_j \in [\alpha_{\min}, \alpha_{\max}]$
- 422 4. kept track of the total prevalence  $N_I$  as the sum of the prevalences of the  
423 individual strains  $N_{I_j}$ ,  $j = 0, \dots, 2^J - 1$ —i.e.  $N_I = \sum_{j=0}^{2^J-1} N_{I_j}$
- 424 5. introduced a random contact rate function  $\kappa(t)$  with a constant param-  
425 eter  $\kappa_0$  that is Poisson distributed on  $[t, t + 1)$ ,  $t = 0, 1, \dots$ , multiplied  
426 by an adaptive response function that reduces the contact rate with in-  
427 creasing disease prevalence, such that the  $\kappa(t)$  is reduced to  $\kappa_0/2$  when  
428 the  $N_I(t)/(N_0 - N_D) = p^{\text{half}}$ —see Eq. A.10 in Appendix A
- 429 6. update the epidemiological state of the agents  $A_i$  with respect to each  
430 of the strains  $j = 0, \dots, 2^J - 1$  where the state with respect to particular  
431 strain  $j$  at time  $t$  is represented by
  - 432 (a) 0: has never been infected with this strain
  - 433 (b)  $E_j(t, \tau_{ij})$ : infected at time  $\tau_{ij} \leq t$  with this strain, but not yet infec-  
434 tious for an expected period of  $\sigma_E$  units of time
  - 435 (c)  $I_j(t, \tau_{ij})$ : infectious at time  $t$  with this strain, for an expected period  
436 of  $\sigma_I$  units of time, having been most recently infected (reinfections  
437 with the same strain may occur) with this strain at time  $\tau_{ij} < t$
  - 438 (d)  $V_j(t, \tau_{ij})$ : has now recovered from its most recent infection at time  
439  $\tau_{ij}$  with this strain and has some level of waning immunity to it  
440 where we assume that agent  $A_i$  can be infected at time  $t$  with at most one  
441 dominant strain (denoted by the index  $j$ ), although it will have different  
442 levels of waning immunity to all of the strains to which it has been infected  
443 in the past
- 444 7. included waning immunity functions  $\omega_{ij}(t)$  (symbol is omega: Eq. A.6)  
445 used to compute the level of immunity that agent  $A_i$  has to its most  
446 recent infection by strain  $j$
- 447 8. included cross immunity constraints (a  $J^2$ -matrix  $C$ ) that apply both to  
448 the *infecter* transmitting the pathogen and the *infectee* being invaded (inv)  
449 by the pathogen, both of which reduce the likelihood of infection and strain  
450 drift by strain  $j$  compared with closely related strains  $\ell$
- 451 9. computed an *infection probability*  $\pi_{ih,j\ell}^{\text{inf}}$  that agent  $A_i$  infected with strain  
452  $j$  infects agent  $A_h$  with strain  $\ell$  in terms of a concatenation of infecter  
453 viral shedding ( $\zeta_{i\ell}$ ), viral persistence in the environment ( $\varepsilon_\ell$ ), and viral  
454 transmission ( $\beta_{h\ell}$ ) processes (Fig. 1)



- 455 10. computed an *invasion probability*  $\pi_{h\ell\ell'}^{\text{inv}}$  that an agent  $A_h$  infected with  
456 strain  $\ell$  becomes infectious with strain  $\ell'$  as its major strain, in terms  
457 of the multiplicative effects of viral mutation ( $\mu$ ) and viral replication  
458 ( $\lambda_\ell$ ) processes ongoing within an infectee  $A_h$  during this infectees exposed  
459 ( $E_{\ell'\tau_{h\ell'}}$ ) and infectious ( $I_{\ell'\tau_{h\ell'}}$ ) stages (Fig. 1)
- 460 11. computed the overall probability  $\pi_{ih,j\ell'}$  that that an infector  $A_i$  infected  
461 with major strain  $j$  results in an infectee  $A_h$  expressing  $\ell'$  as its major  
462 strain
- 463 12. implemented a discrete time individual-based stochastic SEIVD (here V  
464 represents individuals that have either recovered from infection or have  
465 been vaccinated, D represents cumulative dead) multi-strain model that  
466 includes specifiable time-dependent univalent and multivalent vaccination  
467 applications

## 468 **Our J-RAMP implementation**

469 Models of systems process can be coded as singular implementations model for-  
470 mulations using: i) highly efficiently compilable computer languages (e.g., C++,  
471 FORTRAN, Java) ; or ii) less efficiently, but more easily coded, scriptable (e.g.,  
472 JavaScript, Python, Perl) computer languages. More conveniently and expedi-  
473 tiously, they can be coded up, as discussed in [52], using a systems modeling  
474 platform, such as Matlab's SIMULINK, Mathematica, Stella, AnyLogic, Num-  
475 erus, or Berkeley Madonna. Advantages of the latter include more rapid and  
476 accurate model development, though simulations may be slowed down by plat-  
477 form overhead. Between these extremes, we propose a more general approach  
478 to specific classes of systems' models, where the basic system structure is fixed,  
479 but implementation of some elements can be easily and safely altered so that  
480 optional implementations are presented at runtime. We call such a design *run-*  
481 *time alterable-model platforms*. (RAMPs); and here we present a Java RAMP  
482 implementation of the SEIVD-IBM described in the previous subsection.

- 483 The characteristics we envision for a model platform to be a RAMP are:
- 484 1. RAMPs include a set of model parameters (constants) whose values can  
485 be selected or specified (sometimes within a predefined range of values)  
486 at simulation runtime using a switch, nob, slider, or text-entry window  
487 accessed via a platform graphical interface or dashboard (e.g., see Fig. 2  
488 and Table 1 which apply to our SEIVD-IBM J-RAMP).
  - 489 2. RAMPs include a specific set of *runtime alternative modules*, (RAMs),  
490 where the original can be redefined in a graphical interface window, and  
491 the unaltered original and the alternative routines are stored as a (prefer-  
492 ably open-ended) numbered set. The original or any one of the alternatives  
493 can be selected for use at runtime (for a list of functions in our RAMP  
494 see Table 2).
  - 495 3. RAMP implementations also provide an API for both remote and on-  
496 board scripting. This API enables control of all user aspects of the simu-  
497 lation, including the parameter set, run management, RAM options, and  
498 data retrieval. Script logic can alter parameter settings and RAM options  
499 as the simulation progresses. A Nashorn-based Javascript interpreter en-  
500 hanced with API methods is provided.
  - 501 4. The API can be accessed remotely using operating system facilities by  
502 external applications running concurrently with the simulator. Of particu-  
503 lar interest is the ability to control the simulation from the R statistical  
504 platform. An R routine can be formulated to both manage the simulation  
505 run and to retrieve and process the resulting data. The RAMP simulation  
506 becomes a “virtual package” to the controlling R logic. See Appendix B.

507 We implemented our RAMP using Java and made ample use of all of the fea-  
508 tures described above. Use of the RAM facility permitted experimentation with  
509 the several versions of cross immunity presented in this paper. A Javascript pro-  
510 gram was used to control an adaptive vaccination strategy. A small R package  
511 serving as a driver was used in an R program that ran the simulation multiple  
512 times, extracted results into R data structures, and produced graphs showing  
513 statistical mean and standard deviation. More details on the graphical structure  
514 and implementation of our SEIVD-IBM are both implied in the presentation of  
515 results below, and in additional details provided in Appendix B.

## 516 COVID-19 model assumptions and parameter values

517 The first variable that needs to be determined is the unit of time we use for  
518 our simulations because all process rate parameters are scaled by its selection.  
519 Since the time resolution of empirical COVID-19 incidence and mortality data  
520 is daily, we selected as unit of time  $t$  to be days. Additionally, based on various  
521 sources including a metapopulation study of COVID-19 parameter estimates  
522 [53], we set the latent and infectious periods to be 4 and 7 days respectively.  
523 Basic SEIR epidemiological models do not separate out the processes of contact  
524 and transmission-per-contact, so we had some leeway on what values to choose  
525 for contact rates and transmission rates per contact because it is the value of  
526 the product of these that is important in determining the reproductive value,  
527 commonly referred to as “ $R_0$ ” for COVID-19. Hussein et al.’s [53] meta analysis  
528 of COVID-19 zeroed in on  $R_0 = 3.14$  as a mean value across a range of studies

529 (95% confidence interval [2.69, 3.59]) though these authors suggested that the  
530 most recent studies they looked at suggested that  $R_0$  was more likely between  
531 2 and 3.

532 Assuming no seasonal effects (i.e.,  $\delta = 0$  in Eq. 3), in our single strain runs  
533 we kept  $R_0 \approx 3$  by setting  $\kappa = 4$  (effective contacts per day, which nominally  
534 involves being with 6 feet of one another at least 15 mins) thereby requiring  
535  $\beta = 0.3$ , because in the notation of the continuous time model introduced in  
536 Eq. A.29, we have an inverse latent period value of  $\gamma \equiv 1/\sigma_E = 1/4$  and an  
537 inverse infectious period value of  $\rho \equiv 1/\sigma_I = 1/7$  days (Table 1) for Eq. A.29 to  
538 yield  $R_0 = \frac{4 \times 0.3}{1/4 + 1/7} = 3.05$

539 In our multistrain runs, we did allow for the emergence of strains that were  
540 more transmissible than this single strain value (in these runs new strains were  
541 in the range [0,0.475] (see table depicted in Fig. C.4). Also, although the incu-  
542 bation period is typically thought to have a median of 5 days, it can be much  
543 faster [54].

544 In reality, the contact rate  $\kappa$  is not constant, but is time varying. It is influ-  
545 enced by the social distancing behavior of individuals who may be responding  
546 to fears of contracting the disease, or regulations imposed by local authorities  
547 to reduce effective contact rates. To account for this, we formulated an adap-  
548 tive contact rate function  $\kappa(t)$  (Eq. A.10) in terms of a function that declines  
549 adaptively from a non-epidemic (baseline maximum) value  $\kappa_0$  to  $\kappa_0/2$  when the  
550 prevalence (the percentage of the population infectious at time  $t$ ) increases to  
551  $\frac{N_I(t)}{N(t) - N_D(t)} = p_I^{\text{half}}$ . In the illustrative simulations presented here, we explore the  
552 effect of varying  $p_I^{\text{half}}$  on the size of the shape of epidemic, but set  $p_I^{\text{half}} = 0.002$   
553 (i.e., a prevalence level of 0.2%) as a baseline value, because in our simulations  
554 this baseline value, along with the parameter values selected above, results in a  
555 cumulative number of cases to just over 11% in a population of  $N = 100,000$   
556 (Appendix C, Fig. C.3). This puts our illustrative baseline case in the ballpark  
557 of the US outbreak which [Worldometer](#) reported to have a cumulative case level  
558 of 8.5% ( $\approx 284.5 \times 10^6 / 332.9 \times 10^6$ ) after one year, but this is likely to be a  
559 substantial underestimate of the actual number of cases [55].

560 To keep things simple in applying our model to a multistrain setting, we  
561 assumed that the immune effects on infector shedding and mutation and repli-  
562 cation within the infectee through a cross-immunity processes, can be tweaked  
563 through a single constant  $c \in [0, 1)$  (making the elements  $c_{j\ell}$  of the matrix  
564  $C$  strain-dependent will obviously require considerable supporting data). One  
565 scenario is to assume cross immunity only applies to nearest neighbors, i.e.:

$$\text{Nearest-neighbor } \mathbf{C}: \quad c_{j\ell} = \begin{cases} 1 & \text{if } \ell = j \\ c & \text{if } \ell \text{ differs from } j \text{ by one allele} \\ 0 & \text{otherwise} \end{cases} \quad (1)$$

566 For other formulations, such as “Cascading  $\mathbf{C}$ ” or including escape mutations  
567 in the mix see Eqs. A.7 and A.9 in Appendix A.

568 Additionally, we expect this type of evidence to become increasing available  
569 with whole genome sequence of pathogen strains [56] collected during host shed-  
570 ding. For simplicity’s sake, however, we assume that infectee with major strain  
571  $j$  will shed minor strains in the immediate neighborhood of  $j$  at comparative

572 rate  $\zeta \in [0, 1)$  and be major strain-independent: i.e., we assume

$$\zeta_{j\ell} = \begin{cases} 1 & \text{if } \ell = j \\ \zeta & \text{if } \ell \text{ differs from } j \text{ by one allele} \\ 0 & \text{otherwise} \end{cases} \quad (2)$$

573 Third, again in the absence of evidence to the contrary, we assume that  
574 seasonal fluctuations are strain independent. In this case, for strain-independent  
575 constants  $\delta \in [0, 1)$  and  $\theta \in [-\pi, \pi]$  that set seasonal fluctuations related to  
576 environmental persistence, Eq. A.13 in the Appendix A simplifies for a single  
577 constant  $\bar{\eta}$  to:

$$\eta_{\ell}(t) = \bar{\eta} \left( 1 + \delta \sin \left( \frac{2\pi t}{365} + \theta \right) \right) \quad \forall \ell \quad (3)$$

578 In our multistrain simulations, for purposes of illustration, we set both the  
579 shedding parameter  $\zeta$  in Eq. 2 above and  $\mu$  in Eq. A.16 to be 0.001. Obviously, it  
580 would be of considerable interest to know how the values of these two parameters  
581 impact strain proliferation, but this is left to future studies when data are  
582 available to guide simulations of realistic scenarios.

### 583 Acknowledgements and Funding Sources

584 This work was funded in part by NSF Grant 2032264 (PI: WMG).

## References

- 585
- 586 [1] Anderson RM. The impact of vaccination on the epidemiology of infectious  
587 diseases. In: *The Vaccine Book*. Elsevier; 2016. p. 3–31.
- 588 [2] Kohli M, Maschio M, Becker D, Weinstein MC. The potential public health  
589 and economic value of a hypothetical COVID-19 vaccine in the United  
590 States: Use of cost-effectiveness modeling to inform vaccination prioritiza-  
591 tion. *Vaccine*. 2021;39(7):1157–1164.
- 592 [3] Eguia RT, Crawford KH, Stevens-Ayers T, Kelnhofer-Millevolte L,  
593 Greninger AL, Englund JA, et al. A human coronavirus evolves antigeni-  
594 cally to escape antibody immunity. *PLoS pathogens*. 2021;17(4):e1009453.
- 595 [4] Jeyanathan M, Afkhami S, Smaill F, Miller MS, Lichty BD, Xing Z. Im-  
596 munological considerations for COVID-19 vaccine strategies. *Nature Re-  
597 views Immunology*. 2020;20(10):615–632.
- 598 [5] Koopman JS, Simon CP, Getz WM, Salter R. Modeling the population  
599 effects of epitope specific escape mutations in SARS-CoV-2 to guide vac-  
600 cination strategies. *medRxiv*. 2021;.
- 601 [6] Sariol A, Perlman S. Lessons for COVID-19 immunity from other coron-  
602 avirus infections. *Immunity*. 2020;.
- 603 [7] Tai W, Wang Y, Fett CA, Zhao G, Li F, Perlman S, et al. Recombinant  
604 receptor-binding domains of multiple Middle East respiratory syndrome  
605 coronaviruses (MERS-CoVs) induce cross-neutralizing antibodies against  
606 divergent human and camel MERS-CoVs and antibody escape mutants.  
607 *Journal of virology*. 2017;91(1).
- 608 [8] Harvey WT, Carabelli AM, Jackson B, Gupta RK, Thomson EC, Harrison  
609 EM, et al. SARS-CoV-2 variants, spike mutations and immune escape.  
610 *Nature Reviews Microbiology*. 2021;p. 1–16.
- 611 [9] Saad-Roy CM, Levin SA, Metcalf CJE, Grenfell BT. Trajectory of in-  
612 dividual immunity and vaccination required for SARS-CoV-2 community  
613 immunity: A conceptual investigation. *Journal of the Royal Society Inter-  
614 face*. 2021;18(175):20200683.
- 615 [10] Saad-Roy CM, Wagner CE, Baker RE, Morris SE, Farrar J, Graham AL,  
616 et al. Immune life history, vaccination, and the dynamics of SARS-CoV-2  
617 over the next 5 years. *Science*. 2020;370(6518):811–818.
- 618 [11] Willem L, Verelst F, Bilcke J, Hens N, Beutels P. Lessons from a decade of  
619 individual-based models for infectious disease transmission: a systematic  
620 review (2006-2015). *BMC infectious diseases*. 2017;17(1):612.
- 621 [12] Chowell G, Sattenspiel L, Bansal S, Viboud C. Mathematical models to  
622 characterize early epidemic growth: A review. *Physics of life reviews*.  
623 2016;18:66–97.

- 624 [13] Keskinocak P, Oruc BE, Baxter A, Asplund J, Serban N. The impact of  
625 social distancing on COVID19 spread: State of Georgia case study. *Plos*  
626 *one*. 2020;15(10):e0239798.
- 627 [14] Abueg M, Hinch R, Wu N, Liu L, Probert W, Wu A, et al. Modeling  
628 the effect of exposure notification and non-pharmaceutical interventions  
629 on COVID-19 transmission in Washington state. *NPJ digital medicine*.  
630 2021;4(1):1–10.
- 631 [15] Chen PZ, Bobrovitz N, Premji Z, Koopmans M, Fisman DN, Gu FX. Het-  
632 erogeneity in transmissibility and shedding SARS-CoV-2 via droplets and  
633 aerosols. *eLife*. 2021 apr;10:e65774. Available from: [https://doi.org/  
634 10.7554/eLife.65774](https://doi.org/10.7554/eLife.65774).
- 635 [16] van Doremalen N, Bushmaker T, Morris DH, Holbrook MG, Gamble  
636 A, Williamson BN, et al. Aerosol and Surface Stability of SARS-CoV-  
637 2 as Compared with SARS-CoV-1. *New England Journal of Medicine*.  
638 2020;382(16):1564–1567. Available from: [https://doi.org/10.1056/  
639 NEJMc2004973](https://doi.org/10.1056/NEJMc2004973).
- 640 [17] Maginnis MS. Virus–receptor interactions: the key to cellular invasion.  
641 *Journal of molecular biology*. 2018;430(17):2590–2611.
- 642 [18] Challen R, Brooks-Pollock E, Read JM, Dyson L, Tsaneva-Atanasova K,  
643 Danon L. Risk of mortality in patients infected with SARS-CoV-2 variant  
644 of concern 202012/1: matched cohort study. *bmj*. 2021;372.
- 645 [19] Lavine JS, Bjornstad ON, Antia R. Immunological characteristics govern  
646 the transition of COVID-19 to endemicity. *Science*. 2021;371(6530):741–  
647 745.
- 648 [20] Alizon S, Luciani F, Regoes RR. Epidemiological and clinical consequences  
649 of within-host evolution. *Trends in microbiology*. 2011;19(1):24–32.
- 650 [21] Fenichel EP, Castillo-Chavez C, Ceddia MG, Chowell G, Parra PAG, Hick-  
651 ling GJ, et al. Adaptive human behavior in epidemiological models. *Proce-*  
652 *edings of the National Academy of Sciences*. 2011;108(15):6306–6311.
- 653 [22] Gozzi N, Bajardi P, Perra N. The importance of non-pharmaceutical in-  
654 terventions during the COVID-19 vaccine rollout. *medRxiv*. 2021; Avail-  
655 able from: [https://www.medrxiv.org/content/early/2021/01/09/  
656 2021.01.09.21249480](https://www.medrxiv.org/content/early/2021/01/09/2021.01.09.21249480).
- 657 [23] Kumar A, Dowling WE, Román RG, Chaudhari A, Gurry C, Le TT, et al.  
658 Status Report on COVID-19 Vaccines Development. *Current Infectious*  
659 *Disease Reports*. 2021;23(6):1–12.
- 660 [24] Chretien JP, George D, Shaman J, Chitale RA, McKenzie FE. In-  
661 fluenza forecasting in human populations: a scoping review. *PloS one*.  
662 2014;9(4):e94130.

- 663 [25] Getz WM, Gonzalez JP, Salter R, Bangura J, Carlson C, Coomber M,  
664 et al. Tactics and strategies for managing Ebola outbreaks and the salience  
665 of immunization. *Computational and mathematical methods in medicine*.  
666 2015;2015.
- 667 [26] Getz WM, Salter R, Mgbara W. Adequacy of SEIR models when epidemics  
668 have spatial structure: Ebola in Sierra Leone. *Philosophical Transactions  
669 of the Royal Society B*. 2019;374(1775):20180282.
- 670 [27] Drake JM. Limits to forecasting precision for outbreaks of directly trans-  
671 mitted diseases. *PLoS Med*. 2005;3(1):e3.
- 672 [28] Jefferies JM, Clarke SC, Webb JS, Kraaijeveld AR. Risk of red queen  
673 dynamics in pneumococcal vaccine strategy. *Trends in microbiology*.  
674 2011;19(8):377–381.
- 675 [29] Thomas LJ, Huang P, Yin F, Luo XI, Almquist ZW, Hipp JR, et al. Spa-  
676 tial heterogeneity can lead to substantial local variations in COVID-19  
677 timing and severity. *Proceedings of the National Academy of Sciences*.  
678 2020;117(39):24180–24187.
- 679 [30] Getz WM, Salter R, Luisa Vissat L, Horvitz N. A versatile web app for  
680 identifying the drivers of COVID-19 epidemics. *Journal of Translational  
681 Medicine*. 2021;19(1):1–20.
- 682 [31] Da Silva RM, Mendes CF, Manchein C. Scrutinizing the heterogeneous  
683 spreading of COVID-19 outbreak in large territorial countries. *Physical  
684 Biology*. 2021;18(2):025002.
- 685 [32] Zhang J, Litvinova M, Liang Y, Wang Y, Wang W, Zhao S, et al. Changes in  
686 contact patterns shape the dynamics of the COVID-19 outbreak in China.  
687 *Science*. 2020;.
- 688 [33] Udwardia ZF, Raju RS. How to protect the protectors: 10 lessons to learn  
689 for doctors fighting the COVID-19 coronavirus. *Medical Journal, Armed  
690 Forces India*. 2020;.
- 691 [34] Van Damme W, Dahake R, van de Pas R, Vanham G, Assefa Y. COVID-19:  
692 Does the infectious inoculum dose-response relationship contribute to un-  
693 derstanding heterogeneity in disease severity and transmission dynamics?  
694 *Medical hypotheses*. 2021;146:110431.
- 695 [35] Zhao Z, Li H, Wu X, Zhong Y, Zhang K, Zhang YP, et al. Moderate  
696 mutation rate in the SARS coronavirus genome and its implications. *BMC  
697 evolutionary biology*. 2004;4(1):1–9.
- 698 [36] Geoghegan JL, Holmes EC. The phylogenomics of evolving virus virulence.  
699 *Nature Reviews Genetics*. 2018;19(12):756–769.
- 700 [37] Larsen LG, Eppinga MB, Passalacqua P, Getz WM, Rose KA, Liang  
701 M. Appropriate complexity landscape modeling. *Earth-science reviews*.  
702 2016;160:111–130.



- 703 [38] Yang P, Yang G, Qi J, Sheng B, Yang Y, Zhang S, et al. The effect of mul-  
704 tiple interventions to balance healthcare demand for controlling COVID-19  
705 outbreaks: a modelling study. *Scientific reports*. 2021;11(1):1–13.
- 706 [39] Baker RE, Park SW, Yang W, Vecchi GA, Metcalf CJE, Grenfell BT.  
707 The impact of COVID-19 nonpharmaceutical interventions on the future  
708 dynamics of endemic infections. *Proceedings of the National Academy of*  
709 *Sciences*. 2020;117(48):30547–30553.
- 710 [40] Greaney AJ, Starr TN, Gilchuk P, Zost SJ, Binshtein E, Loes AN,  
711 et al. Complete mapping of mutations to the SARS-CoV-2 spike receptor-  
712 binding domain that escape antibody recognition. *Cell host & microbe*.  
713 2021;29(1):44–57.
- 714 [41] Brüssow H. COVID-19: emergence and mutational diversification of SARS-  
715 CoV-2. *Microbial Biotechnology*. 2021;14(3):756–768.
- 716 [42] Keeling MJ, Eames KT. Networks and epidemic models. *Journal of the*  
717 *Royal Society Interface*. 2005;2(4):295–307.
- 718 [43] Roberts GO, Rosenthal JS, et al. General state space Markov chains and  
719 MCMC algorithms. *Probability Surveys*. 2004;1:20–71.
- 720 [44] Lele SR, Dennis B, Lutscher F. Data cloning: easy maximum likelihood es-  
721 timation for complex ecological models using Bayesian Markov chain Monte  
722 Carlo methods. *Ecology letters*. 2007;10(7):551–563.
- 723 [45] Suthar MS, Zimmerman MG, Kauffman RC, Mantus G, Linderman SL,  
724 Hudson WH, et al. Rapid generation of neutralizing antibody responses in  
725 COVID-19 patients. *Cell Reports Medicine*. 2020;1(3):100040.
- 726 [46] Muruato AE, Fontes-Garfias CR, Ren P, Garcia-Blanco MA, Menach-  
727 ery VD, Xie X, et al. A high-throughput neutralizing antibody assay  
728 for COVID-19 diagnosis and vaccine evaluation. *Nature communications*.  
729 2020;11(1):1–6.
- 730 [47] Tkachenko AV, Maslov S, Elbanna A, Wong GN, Weiner ZJ, Goldenfeld  
731 N. Time-dependent heterogeneity leads to transient suppression of the  
732 COVID-19 epidemic, not herd immunity. *Proceedings of the National*  
733 *Academy of Sciences*. 2021;118(17).
- 734 [48] Koyama T, Weeraratne D, Snowdon JL, Parida L. Emergence of drift vari-  
735 ants that may affect COVID-19 vaccine development and antibody treat-  
736 ment. *Pathogens*. 2020;9(5):324.
- 737 [49] Getz WM, Lloyd-Smith JO. Basic methods for modeling the invasion and  
738 spread of contagious diseases. *DIMACS Series in Discrete Mathematics*  
739 *and Theoretical Computer Science*. 2006;71:87.
- 740 [50] McCallum H, Barlow N, Hone J. How should pathogen transmission be  
741 modelled? *Trends in ecology & evolution*. 2001;16(6):295–300.

- 742 [51] Anderson RM, May RM, et al. Coevolution of hosts and parasites. *Parasitology*. 1982;85(Pt 2):411–426.  
743
- 744 [52] Getz WM, Salter R, Lyons AJ, Sippl-Swezey N. Panmictic and clonal  
745 evolution on a single patchy resource produces polymorphic foraging guilds.  
746 *PloS one*. 2015;10(8):e0133732.
- 747 [53] Hussein M, Toraih E, Elshazli R, Fawzy M, Houghton A, Tatum D, et al.  
748 Meta-analysis on serial intervals and reproductive rates for SARS-CoV-2.  
749 *Annals of surgery*. 2021;273(3):416–423.
- 750 [54] Grimm V, Mengel F, Schmidt M. Extensions of the SEIR model for the  
751 analysis of tailored social distancing and tracing approaches to cope with  
752 COVID-19. *Scientific Reports*. 2021;11(1):1–16.
- 753 [55] Wu SL, Mertens AN, Crider YS, Nguyen A, Pokpongkiat NN, Djajadi S,  
754 et al. Substantial underestimation of SARS-CoV-2 infection in the United  
755 States. *Nature communications*. 2020;11(1):1–10.
- 756 [56] Munnink BBO, Nieuwenhuijse DF, Stein M, O’Toole Á, Haverkate M,  
757 Mollers M, et al. Rapid SARS-CoV-2 whole-genome sequencing and analy-  
758 sis for informed public health decision-making in the Netherlands. *Nature*  
759 *medicine*. 2020;26(9):1405–1410.
- 760 [57] Kramer A, Schwebke I, Kampf G. How long do nosocomial pathogens per-  
761 sist on inanimate surfaces? A systematic review. *BMC infectious diseases*.  
762 2006;6(1):1–8.
- 763 [58] Liu X, Huang J, Li C, Zhao Y, Wang D, Huang Z, et al. The role of  
764 seasonality in the spread of COVID-19 pandemic. *Environmental research*.  
765 2021;195:110874.
- 766 [59] Valtonen A, Molleman F, Chapman CA, Carey JR, Ayres MP, Roininen  
767 H. Tropical phenology: Bi-annual rhythms and interannual variation in an  
768 Afrotropical butterfly assemblage. *Ecosphere*. 2013;4(3):1–28.
- 769 [60] Getz WM, Salter R, Muellerklein O, Yoon HS, Tallam K. Modeling epi-  
770 demics: A primer and Numerus Model Builder implementation. *Epidemics*.  
771 2018;25:9–19.
- 772 [61] Lythgoe KA, Hall M, Ferretti L, de Cesare M, MacIntyre-Cockett G,  
773 Trebes A, et al. SARS-CoV-2 within-host diversity and transmission.  
774 *Science*. 2021;372(6539). Available from: [https://science.sciencemag.  
775 org/content/372/6539/eabg0821](https://science.sciencemag.org/content/372/6539/eabg0821).
- 776 [62] Jones JH. Notes on R0. California: Department of Anthropological Sciences.  
777 2007;323.

778 **Figures and Tables**

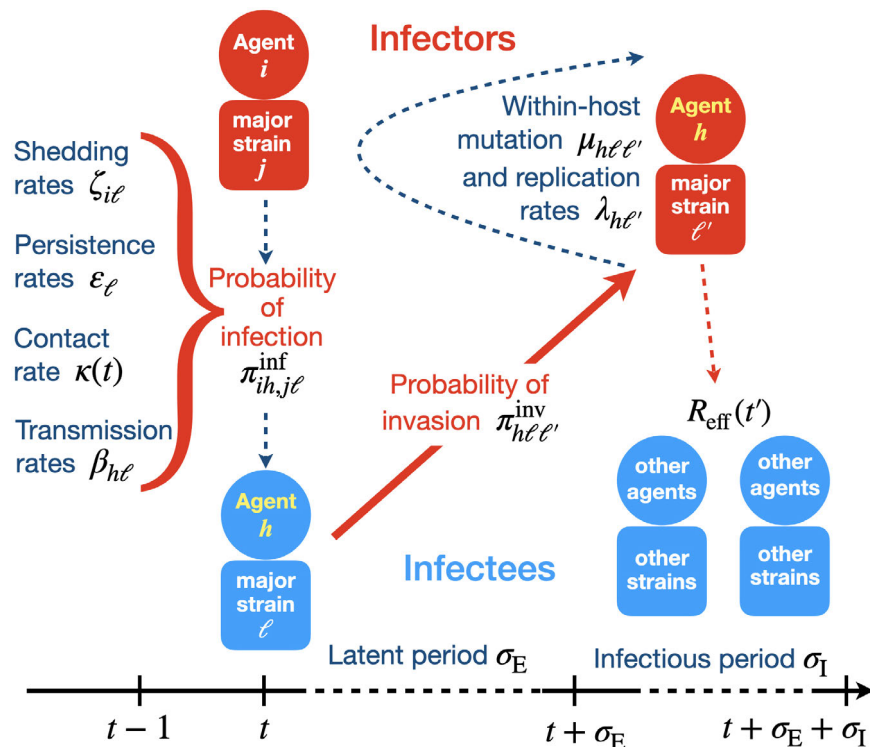

Figure 1: An overview of the processes included in our SEIVD-IBM model. The probability  $\pi_{ih,j\ell}^{\text{inf}}$  of  $A_h$  being infected primarily with pathogen  $\ell$  in terms of receiving an effective dose from agent  $A_i$ , ( $\eta$ ) is computed in terms of a concatenation of shedding rates ( $\zeta_{i\ell}$ ), environmental persistence rates ( $\varepsilon_\ell$ ), and host transmission ( $\beta_{h\ell}$ ) processes (Eq. A.15) and includes both waning and cross immunity factors. The probability  $\pi_{h\ell\ell'}^{\text{inv}}$  that the dominant strain emerging in host  $A_h$  is strain  $\ell'$  given initial infection with strain  $\ell$  is computed in terms of within-host mutation and within-host replication process (Eq. A.16) and also includes both waning and cross immunity factors. These two probabilities are then used to compute the overall probability  $\pi_{ih,j\ell'}$  (Eq. A.17) that infector  $i$ , infected with major strain  $j$ , infects infectee  $h$  with major strain  $\ell'$ . The quantity  $R_{\text{eff}}(t')$  is the expected number of individuals each infectious agent is expected to infect around time  $t' \in [t + \sigma_E, t + \sigma_E + \sigma_I]$ , where  $R_0 = R_{\text{eff}}(0)$  is estimated for our model using Eq. A.29. Equation references for the other mathematical functions provided in this figure are given in Table 2.

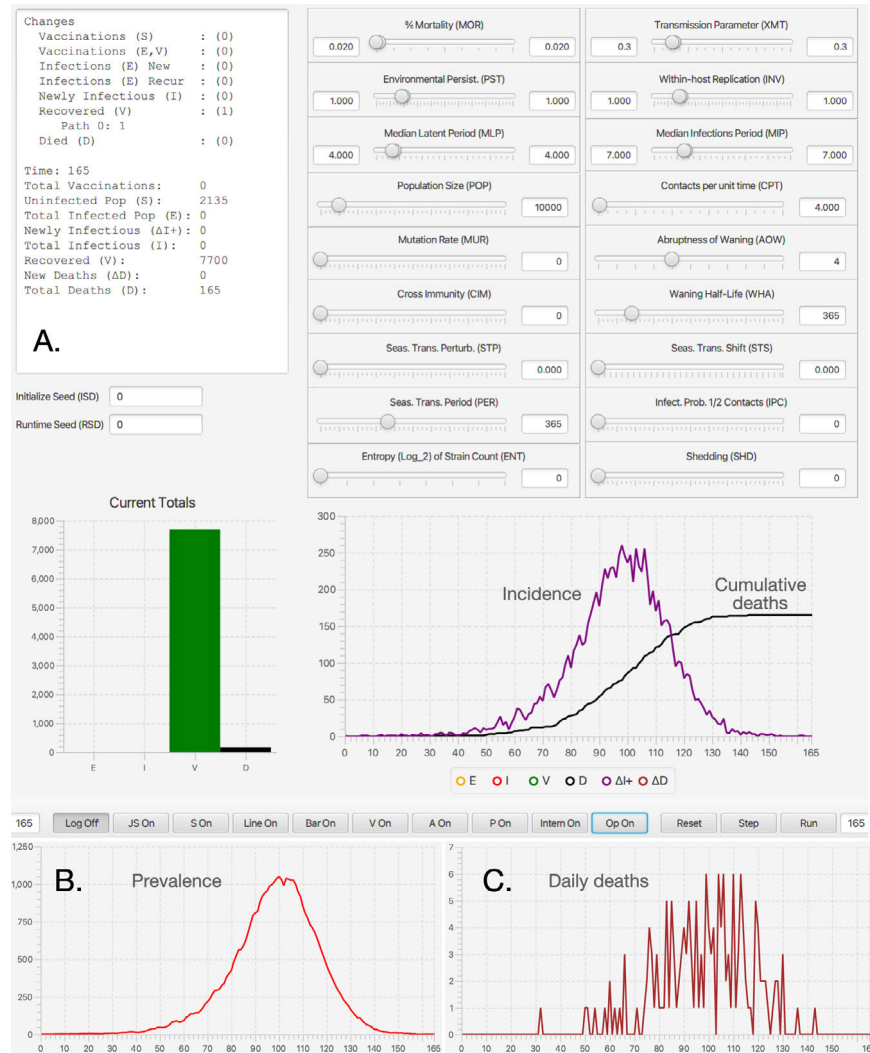

Figure 2: **A.** The dashboard of our Java Runtime-Alterable-Model Platform (J-RAMP) SEIRD (S=susceptibles, E=exposed, I=infectious, V=immune, D=dead) individual-based model (IBM) and simulations obtained using the parameters values depicted in the slider windows (also see Table 1). The top left window of this dashboard contains information on the final state of the population (in this case  $S = 2135$  and  $D = 165$  in a population of  $N_0 = 10,000$ ), the bottom left bar graph of dashboard panel is the final values of E, I, V and D at epidemic cessation at time  $t = 166$  (days) or the simulation run time, whichever comes first. Dashboard also shows a graph of incidence and cumulative deaths (purple and black: selected using colored buttons below the graph). The bottom ribbon of the dash board has a series of radio buttons that respectively open a Log, a JavaScript (JS), and a Scripting (S) window, Line and Bar graph windows (for multistrain runs), as well as windows for controlling vaccination strategies (V), listing realtime agent information (A), pathogen parameter values (P), monitoring probability computations (Intern), coding and controlling runtime alternative operations (Op), and three runtime buttons (Reset, Step, Run). **B.** Graphs of prevalence (cut out from main panel when only the red button is on) and **C.** daily deaths (crimson button) are pasted below the dashboard.

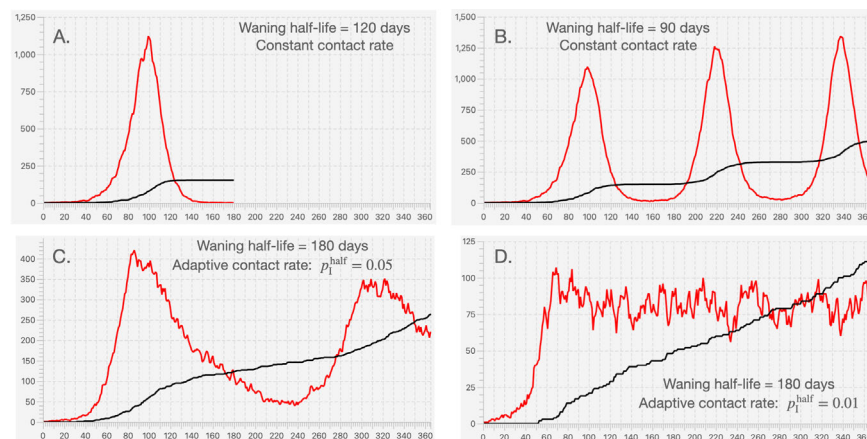

Figure 3: Plots of prevalence (I: red) and dead (D: black) individuals for simulations using the parameter values given in Table 1 with  $N = 10,000$ . The waning immunity half-life values are  $t^{\text{half}} = 90, 120$  or  $180$ , as labeled. In the top two panels the contact rate is constant, while in the bottom two panels it is adaptive with  $p_I^{\text{half}} = 0.05$  or  $0.01$  as labeled (Eq. A.10). Note that the adaptive case approaches the constant case as  $p_I^{\text{half}} \rightarrow \infty$  and that the vertical axis in the four panels each have different scale, though the horizontal time axes is the same in all four case (365 days).

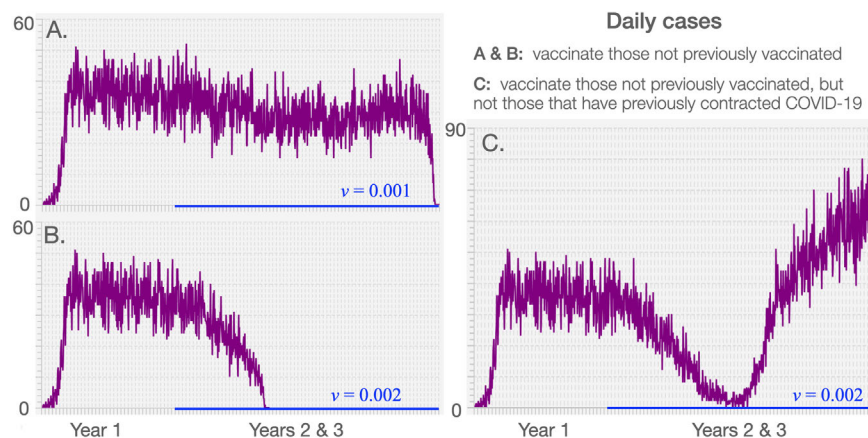

Figure 4: Incidence ( $\Delta I^+$ : purple) is plotted over 3 years for the baseline run (parameters given in Table 1 with  $N = 100,000$ ,  $p_I^{\text{half}} = 0.002$ , and  $t_v^{\text{half}} = 365$ ) for the cases where vaccination rates  $v(t)$  (indicated by blue lines) are applied during the second and third years only to individuals not previously vaccinated selected at random (A.  $v(t) = 0.001$ , B.  $v(t) = 0.002$ ) and to individuals not previously vaccinated and who also have not previously been infected with SARS-CoV-2 (C.  $v(t) = 0.002$ ).



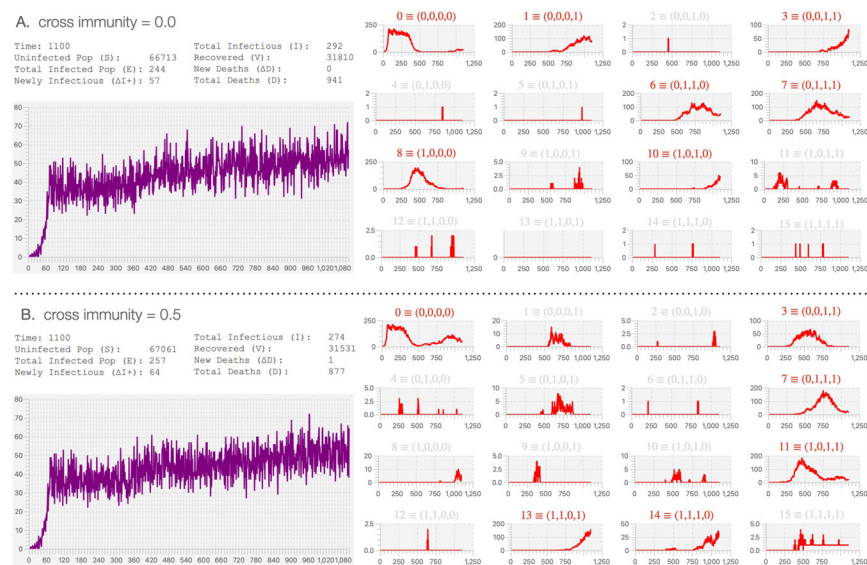

Figure 5: The total daily incidence ( $\Delta I+$ : purple) and strain-specific prevalence (I: red) individuals for a 16-strain epidemic burning through a population of size  $N = 100,000$  are plotted over a 3-year period for the cases where cross-immunity is absent (A.  $c = 0.0$ ) or intermediate among nearest neighbors differing by one allele (B.  $c = 0.5$ ). The remaining parameters are listed in Table 1 and for all strains include the same host transmission ( $\beta = 0.3$ ) and virulence ( $p_\alpha = 0.02$ ), waning half-life  $t^{\text{half}} = 365$ , minor strain shedding  $\zeta = 0.001$  and within host mutation ( $\mu = 0.001$ ) parameter values. Note that each panel has its own vertical scale and that the horizontal scales are set by the J-RAMP and are 0-1100 days for the incidence curves and 0-1250 days for the prevalence curves, although all curves are drawn to 1100 days. Dominant or codominant strains are labeled in red (number and equivalent allele representation), while minor strains are labeled in light grey.

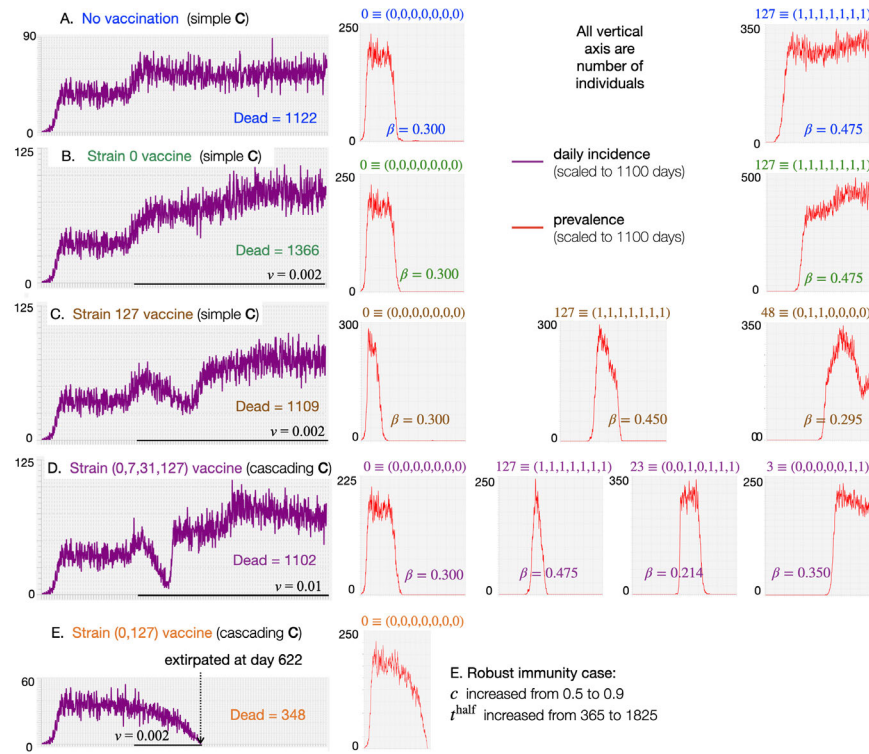

Figure 6: Daily incidence (deep purple curves) and prevalence of individual strains (red curves; with strain number labels plotted in order of emergence over time) that exceeded a maximum prevalence of 12 individuals at any time are plotted over a three year period ( $t \in [0, 1100]$  days), firstly, for three cases (A.-C. in a system with nearest-neighbor only cross-immunity (labeled “simple”, see Eq. 1) and, secondly, in two cases (D. and E.) in a system with cascading cross-immunity (Eq. A.7). In the first three cases we have: A., no vaccination (blue labels); an B. & C., a vaccination rate of  $v = 0.002$  applied in years 2 and 3 ( $t \in [365, 110]$ ) to individuals who have not previously been vaccinated, respectively for the cases of univalent vaccines (strain 0, green labels and strain 127, brown labels). In the fourth case, D., a quadravalent vaccine (strain 0, 7, 31 & 127; plum labels) is applied at a vaccination rate of  $v = 0.01$  (i.e., 1%) at random, irrespective whether or not individuals selected have been previously vaccinated (or ill with COVID-19). In the fifth case, E (“robust immunity case”), a bivalent vaccine (strains 0 & 127; orange labels) is applied, as in cases B. & C., at a vaccination rate of  $v = 0.002$  (i.e., 1%) at random to individuals selected that have been previously vaccinated. In this latter case, however immune waning has been reduced by a factor of 5 ( $t^{\text{half}} = 1825$  days) with cascading cross immunity increased from  $c = 0.5$  to  $c = 0.9$ . The dashboards for all these cases, and miniature prevalence plots of all 128 strains for each of these four cases can be found in Figs. C.5-C.9 in the Appendix. The parameter values are the same as in Fig. 5B, apart from the immune parameters being greatly strengthened in the “robust immunity case” E., and in all cases strain specific transmission parameter values  $\beta_j$  ( $j = 0, \dots, 127$ ) that were randomly assigned values between 0 and 0.3, except for the increasingly dominant strain sequence  $\beta_0 = 0.3$  ( $0 \equiv (0, 0, 0, 0, 0, 0, 0)$ ),  $\beta_1 = 0.325$  ( $1 \equiv (0, 0, 0, 0, 0, 0, 1)$ ),  $\beta_3 = 0.35$  ( $3 \equiv (0, 0, 0, 0, 0, 1, 1)$ ), ...,  $\beta_{127} = 0.475$  ( $127 \equiv (1, 1, 1, 1, 1, 1, 1)$ ) (particular values of  $\beta_j$  are provided for the different strains depicted here; see Table in Fig. C.4 for all values of  $\beta_j$ ,  $j = 0, \dots, 127$ ). Note that the vertical axis are all on the same scale height for incidence, but are individually scaled for prevalence, while the time axis are all on the same scale for the prevalence curves which differs from the incidence curves, which among themselves are all on the same time scale.



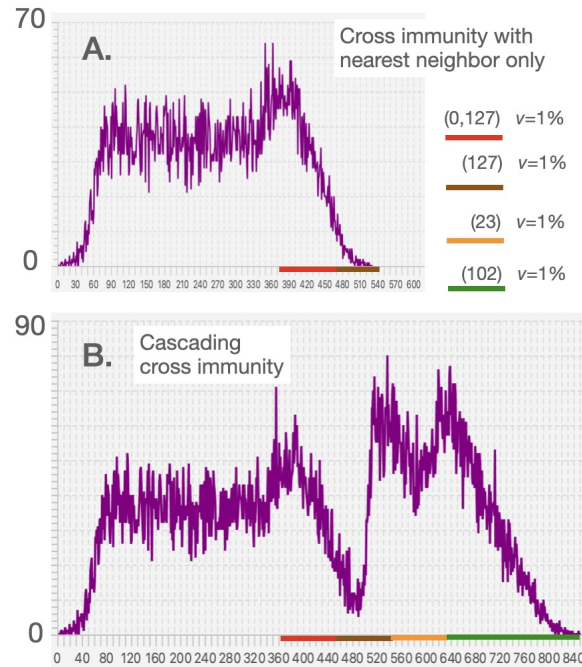

Figure 7: The daily incidences (vertical axis: number of individuals) are plotted over time (horizontal axis: number of days; plots have been squashed to ensure they are all on the same time scale) for two cases: **A.** adaptive vaccination for nearest-neighbor only cross immunity (Eq. 1) and **B.** adaptive vaccination for cascading cross immunity case (Eq. A.7), and should be compared with the non-vaccination case depicted in Fig. 6A and the non-adaptive vaccination case depicted in Fig. 6D. As in this latter non-adaptive case, vaccination is performed on non-infectious individuals, selected at random (i.e., re-vaccinations can occur) at a rate of 1% per day, but now the dominant strain is targeted, as well as a second strain if its prevalence exceeds 10 cases, with vaccine valency switches every 90 days. The realized adaptive vaccine valencies for these two runs are indicated by colored bars on the horizontal time axis (red, valency is (0,127); brown, valency is (127); orange, valency is (23); green, valency is (102)).

Table 1: Parameter values used to simulate single and multistrain outbreaks

| Parameter                                                                                               | Symbol                  | Value                 | Source/Comment                   |
|---------------------------------------------------------------------------------------------------------|-------------------------|-----------------------|----------------------------------|
| <b>Single strain simulations</b>                                                                        |                         |                       |                                  |
| Time unit                                                                                               | $t$                     | daily                 | Goldilocks value*                |
| Nominal pop size                                                                                        | $N_0$                   | 1 to $10 \times 10^4$ | Goldilocks value <sup>‡</sup>    |
| Basic contact rate                                                                                      | $\kappa_0$              | 4 per day             | effective contacts <sup>†</sup>  |
| Transmission                                                                                            | $\beta$                 | 0.3                   | ensures $R_0 \approx 3^+$        |
| Latent Period                                                                                           | $\sigma_E$              | 4 days                | median time in E <sup>¶</sup>    |
| Infectious period                                                                                       | $\sigma_I$              | 7 days                | median time in I <sup>§</sup>    |
| Immunity half-life                                                                                      | $t^{\text{half}}$       | 1/4 to 1 year         | per run specs. <sup>  </sup>     |
| Disease-induced mort.**                                                                                 | $p_\alpha$              | 2% of cases           | mortality rate is $\alpha^\#$    |
| Adaptive contact param.*†                                                                               | $p_I^{\text{half}}$     | 0, 0.002, 0.05        | reduces $\kappa$ from $\kappa_0$ |
| Seasonal fluctuation param.                                                                             | $\delta$                | 0                     | seasons ignored* <sup>+</sup>    |
| <b>Multi strain simulations</b> (single strain parameter values for all strains if not mentioned below) |                         |                       |                                  |
| Mutation rate* <sup>‡</sup>                                                                             | $\mu$                   | 0.001* <sup>#</sup>   | See Eq. A.16                     |
| Strain number                                                                                           | $j = 0, \dots, 2^J - 1$ | $J$ is 1 to 8         | i.e., 2 to 1024 strains          |
| Cross immunity                                                                                          | $c_{jm}$                | 0 & 0.5               | See Eq. 1                        |
| Pathogen shedding                                                                                       | $\bar{c}_{jm}$          | 0.001* <sup>#</sup>   | See Eq. A.12                     |
| Environmental persistence                                                                               | $\bar{\eta}_j$          | 1 for all $j$         | See Eq. A.13                     |
| Transmission                                                                                            | $\bar{\beta}_j$         | [0,0.475]             | per run specs.                   |
| Within-host replication rate                                                                            | $\lambda_j$             | 1 for all $j$         | See Eq. A.16                     |
| Disease-induced mort.**                                                                                 | $p_{\alpha_j}$          | [0,0.05]              | per run specs.                   |

\*Weekly unit produced excessive variation (see SOI)

<sup>‡</sup>Trade-off between excessive demographic stochasticity and simulation run time

<sup>†</sup>Sufficiently long and close to make transmission possible (also see Eq. A.29)

<sup>+</sup>See Eq. A.29

<sup>¶</sup>Reciprocal of  $\gamma$  in continuous time computation of  $R_0$  per Eq. A.29

<sup>§</sup>Reciprocal of  $\rho$  in continuous time computation of  $R_0$  per Eq. A.29

<sup>||</sup>See Eq. A.6: note  $w(t)$  switches from 1 to 0 as immunity goes from complete to absent

<sup>#</sup>This is “virulence” parameter of continuous-time SEIR models

\*\*If  $\alpha \ll 1$  then  $p_{\alpha_j} = 1 - e^{-\alpha} \approx \alpha$

<sup>††</sup>See Eq. A.10. Mostly 0.002 is used. Setting  $p_I^{\text{half}} = 0$  implements  $\kappa(t) = \kappa_0$ , though  $\kappa(t) \rightarrow \kappa_0$  as  $p_I^{\text{half}} \rightarrow \infty$

<sup>++</sup>Implies values of  $k$  and  $\theta$  in Eq. A.13 are irrelevant

<sup>‡‡</sup>Strain independent—strain dependence requires more elaborate model

<sup>##</sup>Quantifies the pass-on rate of mutations rather than the mutational rate of a locus or gene

<sup>\*\*\*</sup>If  $\alpha_j \ll 1$  then  $p_{\alpha_j} = 1 - e^{-\alpha_j} \approx \alpha_j$

Table 2: Variables, indices and functions used in the model

| Symbols                            | Variables and indices                                                          | Equation |
|------------------------------------|--------------------------------------------------------------------------------|----------|
| <b>Variables</b>                   |                                                                                |          |
| $N_S(t), N_A(t), N_D(t)$           | size of sets <b>S</b> , <b>A</b> and <b>D</b>                                  | Eq. A.1  |
| $J, j, m, \ell$ and $\ell'$        | strain entropy and indices $(0, \dots, 2^J - 1)$                               | Eq. A.2  |
| $N_I(t), N_{I_j}(t)$               | number of infectious: total and strain $j$ at time $t$                         |          |
| $A_i, A_h$                         | specific agents $i, h = 1, \dots, N_A(t)$ in set <b>A</b>                      | Eq. A.4  |
| <b>Functions</b>                   |                                                                                |          |
| $\omega_{ij}(t)$                   | waning immunity of $A_i$ w.r.t. strain $j$                                     | Eq. A.6  |
| $\kappa(t)$                        | adaptive contact rate                                                          | Eq. A.10 |
| $\phi_{ij}(t)$                     | immunity modifier                                                              | Eq. A.11 |
| $\zeta_{ij}(t)$                    | shedding rate of strain $j$ by infector $A_i$                                  | Eq. A.12 |
| $\eta_\ell(t)$                     | environmental persistence                                                      | Eq. A.13 |
| $\beta_{h\ell}(t)$                 | strain transmission to infectee $A_h$                                          | Eq. A.14 |
| $\pi_{ih,j\ell}^{\text{inf}}(t)$   | probability $A_i$ infects $A_h$                                                | Eq. A.15 |
| $\pi_{h\ell\ell'}^{\text{inv}}(t)$ | probability $\ell'$ is major strain when $\ell$ invades                        | Eq. A.16 |
| $\pi_{ih,j\ell'}(t)$               | probability $\ell'$ is major strain in $A_h$ when $j$ is major strain in $A_i$ | Eq. A.17 |

## 1 APPENDICES

### 2 A Model Construction

3 Here we formulate an individual-based or agent-based (ABM) SEIR epidemio-  
4 logical model to include host immunological waning and pathogen genetic drift  
5 with variation across strain transmissibility and virulence. [1]

#### 6 Assumptions, definitions, and states

7 The population consists of a well-mixed pool of  $N_0$  individuals that is homoge-  
8 neous except for the fact that some are uninfected (denoted S), some currently  
9 infected (E: exposed and not yet infectious; I infectious and asymptomatic or  
10 symptomatic) or have been infected and are now either dead (D) or recov-  
11 ered/vaccinated with some level of immunity (V) to one or more of  $2^J$  pathogen  
12 strains. This immunity wanes over time and its current level, augmented by  
13 specified levels of strain cross-immunity, factored into an agent specific time-  
14 dependent strain-resistance function that impacts the shedding of mutant strains  
15 by infectors and the within-host replication rates of mutant strains in infectees.

16 At the start of the epidemic, all individuals are assumed to encounter, on  
17 average,  $\kappa_0 > 0$  other individuals during each time period  $[t, t + 1]$ , but this  
18 “effective contacts” rate adaptively decreases with increasing prevalence of the  
19 disease due to the implementation of non-pharmaceutical interventions (social  
20 distancing, hand washing, mask wearing, and other hygienic precautions). In  
21 our selection of epidemiological parameter values, a unit of time is taken to be a  
22 24-hour day. Other scalings of time would then require appropriately adjusted  
23 epidemiological parameter values. Refined versions of the model could include  
24 age-related parameter values and contact rates, as well as contact tracing, quar-  
25 antining, and isolation of infected individuals; but these will not be considered  
26 here.

27 Initially, at model time  $t = 0$ , all individuals are considered SARS-CoV-  
28 2 naïve susceptible apart from one individual who is considered to have just  
29 entered the infectious stage, infected by a pathogen designated as pathogen  
30 strain 0 (wildtype). Throughout the model simulation, the  $N_0$  agents in the  
31 population are partitioned into three disjoint sets: the set of SARS-CoV-2 naïve  
32 individuals,  $\mathbf{S}(t)$ , containing  $N_S(t)$  (the susceptibles); the set of identified agents,  
33  $\mathbf{A}(t)$ , containing  $N_A(t)$  individuals who are either currently infected (time  $t$ )  
34 with a particular strain of SARS-CoV-2, or have some level of waning immunity  
35 to one or more strains of SARS-CoV-2; and the set of dead individuals  $\mathbf{D}(t)$ ,  
36 currently of size  $N_D(t)$ . Only the individuals in  $\mathbf{A}(t)$  are uniquely identified as  
37 they become infected for the first time and make the transition from set  $\mathbf{S}(t)$  to  
38 set  $\mathbf{A}(t)$ , where they are sequentially labeled using the index  $i = 1, \dots, N_A(t)$ .  
39 The single infected individual at time zero will be designated Agent 1 (also  
40 known as patient zero and denoted by  $A_1$ ). Thus at time  $t$  it follows that

$$N_S(t) + N_A(t) + N_D(t) = N_0 \quad (\text{a constant}) \quad (\text{A.1})$$

41 We note that individuals in set  $\mathbf{A}(t)$  can be in a disease state E or I with  
42 respect to pathogen  $j$ , but simultaneously can be in multiple immune states if

43 they have been infected with more than one pathogen strain in the past. We also  
44 note that the distinction between symptomatic and asymptomatic individuals  
45 in state I will not be considered here; and only need be incorporated if testing,  
46 quarantining, and treatment processes are included in the model.

47 The total number of pathogen strains is set by a parameter  $J > 0$ , where each  
48 pathogen is represented by a  $J$ -bit binary number. Thus, there are  $2^J$  possible  
49 strains indexed by  $j = 0, 1, 2, \dots, 2^J - 1$  where  $j$  is the decimal equivalent that  
50 corresponds to a given binary string. The initial strain,  $j = 0$  is the binary  
51 string of  $J$  zeros.

52 Sets of stochastic epidemic events (i.e., transitions from classes S to E, E to  
53 I, I to V or D) are implemented at consecutive integer points in time (one set  
54 of events for each point in time). Events will only be considered on individuals  
55 that have been infected by at least one of the pathogens at some time after  $t = 0$   
56 (this means that initially the epidemic computation proceeds rather rapidly, but  
57 becomes more computationally intensive for each time step as time proceeds).

### 58 Pathogen set

59 At the start of the simulation ( $t = 0$ ), the set of potential pathogens indexed  
60 by  $j = 0, \dots, 2^J - 1$  is generated along with its associated environmental persis-  
61 tence ( $\bar{\eta}_j$ ), transmission ( $\bar{\beta}_j$ ), within host replication ( $\lambda_j$ ) and disease-induced  
62 mortality rate (probability of dying from the disease  $p_{\alpha_j}$ ) parameters. These  
63 may be specified or drawn from underlying distributions (e.g., the uniform dis-  
64 tributions  $\beta \sim \text{Uniform}[\beta_{\min}, \beta_{\max}]$  and so on). Also, our model includes two  
65  $2^J \times 2^J$  matrices of constants that are associated with pathogen mutations dur-  
66 ing strain shedding (elements  $\zeta_{jm}$ ) and cross-immunity (elements  $c_{jm}$ ) processes  
67 and thus involve but are conditioned on either the major strain that an infector  
68 is harboring or on immunological state of the agents involved. These are the  
69 shedding and cross-immunity matrices with elements  $j, m = 1, \dots, 2^J - 1$ . Thus  
70 we generate the following list of parameters associated with our  $2^J$  pathogen  
71 strains:

$$\begin{aligned} \text{Pathogen list} &= & \text{(A.2)} \\ & \{(\bar{\eta}_j, \bar{\beta}_j, \lambda_j, p_{\alpha_j}; \zeta_{jm} \text{ and } c_{jm} \text{ for } m = 0, \dots, 2^J - 1) \mid j = 0, \dots, 2^J - 1\} \end{aligned}$$

### 72 Agent states

73 In accordance with the above set of assumptions, each agent has the following  
74 basic disease states at time  $t$ , where disease states in agent  $A_i$  are referenced by  
75 the time  $\tau_j > 0$  at which the most recent infection with strain  $j$  has occurred  
76 (an individual may be re-infected after immunity to the strain has waned to  
77 relatively low levels):

- 78 1.  $S(t)$ : An individual who at time  $t$  has not been infected with any strain  
79 of the pathogen up to time  $t$ . All these individuals belong to set  $\mathbf{S}(t)$
- 80 2.  $E_j(t, \tau_{ij})$ : An agent  $A_i$  who was infected with strain  $j$  at time  $\tau_{ij}$ , but has  
81 not yet become infectious (this is an individual in the latent stage that  
82 lasts for  $\sigma_E$  units of time). All these individuals belong to set  $\mathbf{A}(t)$

- 83 3.  $I_j(t, \tau_{ij})$ : An agent  $A_i$  who is currently infectious with strain  $j$ , after being  
 84 infected with strain  $j$  at time  $\tau_{ij}$  (this is the infectious stage that lasts for  
 85  $\sigma_I$  units of time). All these individuals belong to set  $\mathbf{I}(t) \subseteq \mathbf{A}(t)$
- 86 4.  $V_j(t, \tau_{ij})$ : An agent  $A_i$  who was infectious with strain  $j$ , having been  
 87 infected with strain  $j$  at time  $\tau_{ij}$ , but is now non-infectious with regard to  
 88 this strain—that is, recovered with some immunity to strain  $j$ , as well as  
 89 some cross immunity to strains closely related to  $j$ . All these individuals  
 90 belong to set  $\mathbf{A}(t)$
- 91 5.  $\mathbf{D}(t)$ : An individual at time  $t$  who has died after being exposed to and  
 92 become infectious with some strain of the pathogen. In a refined version  
 93 of the model, a record will be kept of the time of death and the strain that  
 94 caused death. All these individuals belong to set  $\mathbf{D}(t)$ .

95 Since an agent  $A_i$  may be infected over time by more than one strain  $j$ , its  
 96 complete epidemiological state is represented by a list

$$A_i(t) = \{\text{state w.r.t. pathogen } 0, \dots, \text{state w.r.t. pathogen } 2^J - 1\} \quad (\text{A.3})$$

If a living agent does not fall into any of the categories 2 – 4 with respect to pathogen  $j$ , we denote its epidemiological state at position  $j$  as  $\emptyset$  (the empty set). Consequently, if an agent  $A$  is susceptible at time  $t$  (i.e., an element of  $S(t)$ ), then we write

$$A_0(t) = \{\emptyset, \dots, \emptyset\} \in \mathbf{S}$$

97 However, while such individuals are omitted from the  $A$  list (hence we did not  
 98 subscript the agent  $A$  above), they may be recognized as “virtual members”  
 99 with this implicit state. Some other examples are:

- If  $A_i(t)$  is infected, but not yet infectious, with pathogen strain  $j$  at time  $t$  but has not been infected with any other pathogen in its past history, then

$$A_i(t) = \{\emptyset, \dots, \emptyset, E_j(t, \tau_j), \emptyset, \dots, \emptyset\}$$

- On the other hand if  $A_i$  recovered from an infection with pathogen 0 at time  $\tau_0$ , and is now in infectious with pathogen  $j$  at time  $t$ , having become infected with this pathogen at time  $\tau_j$  then we write

$$A_i(t) = \{V_0(t, \tau_0), \emptyset, \dots, \emptyset, I_j(t, \tau_j), \emptyset, \dots, \emptyset\}$$

100 As we shall see, an agent history may contain at most one instance of either  $E_j$   
 101 or  $I_j$ , while possibly containing multiple instances of  $V_j$ .

## 102 Agent and index sets

103 At the start of each time period, we update the set of identified agents  $\mathbf{A}$  by  
 104 adding susceptibles that became infected with pathogens during the previous  
 105 time period and removing agents that died during the previous time period.  
 106 Thus if  $\mathbb{I}_A$  is the index set for non-empty elements of  $\mathbf{A}$ , with new indices added

107 for newly infected susceptibles and indices removed for individuals that died,  
108 then by definition:

$$\mathbf{A}(t+1) = \{A_i(t+1) | i \in \mathbb{I}_A(t+1)\} \quad (\text{A.4})$$

109 where the number of indices in the updated set  $\mathbb{I}_A(t+1)$  is  $N_A(t+1)$  and the  
110 updated number of dead is  $N_D(t+1)$  at time  $t+1$ .

111 For mathematical convenience all susceptibles  $S$  will also be referred to as  
112  $A_0$ ; i.e., there are  $N_S(t)$  individuals referenced by  $A_0$  at time  $t$ . It will be useful  
113 to partition the set  $\mathbf{A}(t)$  itself into three subsets at time  $t$  by identifying the sets  
114  $\mathbf{E}(t)$  and  $\mathbf{I}(t)$  which respectively contain all agents that are currently in a state  
115  $E_j(t)$  or a state  $I_j(t)$  at time  $t$  for some  $j = 0, \dots, 2^J - 1$ . We note the intersection  
116 of these two sets is empty—i.e.,  $\mathbf{E}(t) \cap \mathbf{I}(t) = \emptyset$ —as will become apparent below  
117 from the transmission process rules set up below. We will use the notation

$$\mathbf{A}_S(t) = \mathbf{A}(t) \setminus (\mathbf{E}(t) \cup \mathbf{I}(t)) \quad (\text{A.5})$$

118 to denote the set of agents in  $\mathbf{A}(t)$  but not in  $\mathbf{E}(t)$  or  $\mathbf{I}(t)$ .

We also identify the set of infectious agents with infectious strain  $j$ . If  $A^j$   
denotes an agent whose epidemiological state contains an entry  $I_j(t, -)$ , then

$$\mathbf{I}_j(t) = \{A_{i_1}^j(t), A_{i_2}^j(t), \dots, A_{i_{N_{I_j}(t)}}^j(t)\},$$

where the number of such agents is denoted by  $N_{I_j}(t)$ , and its index set by

$$\mathbb{I}_{I_j}(t) = \{i_{1_j}, \dots, i_{N_{I_j}(t)}\}.$$

## 119 Epidemiological processes

### 120 Immunity

121 In compartmental SIRS and SEIRS models, a concept of waning immunity and  
122 its impact on epidemics is associated with the rates at which individuals in class  
123 R revert back to class S. In agent-based SIRS and SEIRS models, we have the  
124 opportunity to consider the immunological history of individuals and, hence,  
125 can take a more refined approach to the complex process of how pathogens in  
126 an infector  $A_i$  are passed on to an infectee  $A_h$ . Here we model this as a prob-  
127 ability generated from a concatenation of rates that include pathogen shedding  
128 by  $A_i$ , the survival of pathogens in the environment, whether contained in feces,  
129 urine, sweat, mucosal secretions or water droplets excreted by an infector, and  
130 a process whereby pathogens gain access to a host (entering through wounds,  
131 mucosal membranes or other membranes in the pulmonary or alimentary sys-  
132 tems). We then characterize pathogen within-host strain replication rates in  
133 terms of pathogen mutational and reproductive processes. The final outcome  
134 in our model is either host recovery with some immunity or host death. We  
135 also consider the induction of host immunity through vaccination and make the  
136 assumption that waning immunity is the same, whether it stems from natural  
137 infection or vaccination. Of course, these may be modelled in different ways  
138 should data become available to make this distinction an important modeling



139 consideration.

140

141 Waning immunity. Recall that we use  $A_0$  to denote an anonymous (generic)  
 142 member of  $\mathbf{S}$  and that  $A_i$  for  $i > 0$  refers to a specific individual with an  
 143 associated state list/vector. If some specific  $A_i$  is in immune state  $V_j$  having  
 144 been infected with this strain at time  $\tau_{ij}$ , we assume that the level of relative  
 145 susceptibility of agent  $A_i$  to reinfection by strain  $j$  is given by (noting that the  
 146 existence of the value  $\tau_{ij}$  implies that infection of individual  $i$  by strain  $j$  at  
 147 time  $\tau_{ij}$  ensures that the  $V_j$  is no longer “null”)

$$\omega_{ij}(t, \tau_{ij}) = \begin{cases} 0 & \text{if } V_j \text{ is null} \\ \frac{1}{1 + ((t - \tau_{ij} - \sigma_I - \sigma_E)/t_j^{\text{half}})^\sigma} & \text{if } t \geq \tau_{ij} + \sigma_I + \sigma_E \\ 1 & \text{if } t < \tau_{ij} + \sigma_I + \sigma_E \end{cases} \quad (\text{A.6})$$

148 We note the following: 1.) the first case implies that  $\tau_{ij}$  has yet to be defined; 2.)  
 149 the second case is equivalent to the statement that  $\tau_{ij} \geq 0$  now exists for strain  
 150  $j$ , since this occurs at time  $t = \tau_{ij}$  (through the invocation of state  $E_j(t, \tau_{ij})$ );  
 151 3.)  $\omega_{ij}(t, \tau)$  ranges from 1 (i.e. full “on”) at  $t = \tau + \sigma_I + \sigma_E$  and decays to  
 152 0 as  $t > \tau + \sigma_I + \sigma_E \rightarrow \infty$ ; 4.) agent  $i$  cannot be reinfected with its current  
 153 major strain or with any other strain while it is currently itself in any state  $E_j$   
 154 or  $I_j$  for any  $j = 0, \dots, 2^J - 1$ ; 5.) the larger the value of  $\sigma$  the steeper or more  
 155 abrupt the switch is from full immunity (equal to 1) at time  $\tau$  through 1/2 at  
 156 time  $t_j^{\text{half}}$  to approach 0 as  $t \rightarrow \infty$  (we set  $\sigma = 4$  as providing an intermediate  
 157 level of abruptness).

158

159 Cross immunity with escape mutations. A somewhat more general implemen-  
 160 tation of cross-immunity may be based on the number of alleles by which strains  
 161  $j$  and  $\ell$  differ. If they differ in  $k$  positions, then the level of cross immunity can  
 162 be set to  $c^k$ . In this case

$$\text{Cascading C:} \quad c_{j\ell} = \begin{cases} 1 & \text{if } \ell = j \\ c^k & \text{if } \ell \text{ differs from } j \text{ by } k \text{ alleles and } \ell \end{cases} \quad (\text{A.7})$$

163 In addition to this, one may also designate certain changes in certain alleles as  
 164 “escape mutants” with respect to the progenitor strain. For these, the level of  
 165 cross-immunity would be set to zero. Under these assumptions, a generalization  
 166 of Eq. A.7 would be

$$\text{Escape mutation:} \quad c_{j\ell} = \begin{cases} 1 & \text{if } \ell = j \\ c^k & \text{if } \ell \text{ differs from } j \text{ by } k \text{ alleles} \\ & \text{and } \ell \text{ is not an escape mutation} \\ 0 & \text{if } \ell \text{ is an escape mutation} \end{cases} \quad (\text{A.8})$$

167 In particular, for the case  $J = 7$ , if strain  $(1, x, x, x, x, x, x)$  is an escape  
 168 mutation with respect to some level of immunity to strains  $(0, x, x, x, x, x, x)$ ,  
 169 then Eq. A.8 becomes

$$c_{j\ell} = \begin{cases} 1 & \text{if } \ell = j \\ 0 & \text{if } j \leq 63 \text{ and } \ell > 63 \\ c^k & \text{otherwise, where } \ell \text{ differs from } j \text{ by } k \text{ alleles} \end{cases} \quad (\text{A.9})$$

170 **Vaccination.** A vaccine may be designed to give immunity to one or more  
 171 particular identified strain  $j$ . Vaccination strategies include vaccinating at a  
 172 fixed rate  $v(t)$  (percent of individuals vaccinated at each time period) over a  
 173 fixed period that begins at  $t_v^{\text{on}}$  and ends at  $t_v^{\text{off}}$  and can focus on drawing only  
 174 on: i) individuals in the set  $\mathbf{S}$ , ii) any non-infectious individual in  $\mathbf{S}$  or  $\mathbf{A}$ , or iii)  
 175 any non-infectious, not previously vaccinated individual in  $\mathbf{S}$  or  $\mathbf{A}$ . The vaccine  
 176 itself can be designed as follows:

- 177 • *Dominant strain vaccination at time  $\tau_{\text{vac}}$ .* An individual  $\mathbf{S}$  or  $\mathbf{A}_i$  vacci-  
 178 nated with the dominant strain, say  $j$ , at time  $\tau_{\text{vac}} \in [t_v^{\text{on}}, t_v^{\text{off}}]$  serves to  
 179 add the disease state  $V_j(t, \tau_{\text{vac}})$  to that individual’s list. If the individual  
 180 is already in state  $V_j(t, \tau')$  at time  $t > \tau_{\text{vac}}$ , then its status is updated so  
 181 that at time  $t > \tau_{\text{vac}}$  it is now  $V_j(t, \tau_{\text{vac}})$  rather than  $V_j(t, \tau')$
- 182 • *Multi-strain vaccination at time  $t_{\text{vac}}$ .* An individual  $\mathbf{S}$  or  $\mathbf{A}$  vaccinated with  
 183 a multi strain concoction at time  $\tau \in [t_v^{\text{on}}, t_v^{\text{off}}]$ , say with strain  $j_1, \dots, j_\nu$ ,  
 184 will have their disease status updated with regard to all these strains, as  
 185 in the dominant strain case.

### 186 Infectious contacts

187 Infectious individuals are assumed to make  $\hat{\kappa}$  *effective contacts* each time period;  
 188 where effective contacts are those that are sufficiently close and of a sufficiently  
 189 long duration to constitute a “risk of transmission.” This rate is either a constant  
 190  $\kappa_0$ , or in stochastic implementations drawn from a Poisson distribution  
 191 with mean  $\kappa_0$ , or in adaptive formulations (e.g., under social distancing be-  
 192 haviour) is a function of the severity of the ongoing outbreak. We also assume at  
 193 time  $t$  that under a random contact process, proportion  $\frac{\hat{\kappa}(t)N_S(t)}{N_0 - N_D(t)}$  and  $\frac{\hat{\kappa}(t)N_A(t)}{N_0 - N_D(t)}$   
 194 of these contacts will respectively be with susceptible and with uniquely identi-  
 195 fied agents, although only  $\frac{\hat{\kappa}(t)(N_A(t) - N_E(t) - N_I(t))}{N_0 - N_D(t)}$  of those will be susceptible to  
 196 infection with a new strain or reinfection with the same strain.

197 In the adaptive case, we assume  $\kappa(t)$  decreases from  $\kappa_0$  as the proportion  
 198 of infectious individuals,  $N_I(t)/(N_0 - N_D(t))$ , increases such that  $\kappa(t) = \kappa_0/2$   
 199 when  $N_I(t)/(N_0 - N_D(t)) = p_I^{\text{half}}$ . For convenience of implementation, however,  
 200 we define the following “switching” (as apposed to hyperbolic) function

$$\kappa(t) = \begin{cases} \frac{\kappa_0}{1 + \left(\frac{N_I(t)}{N_0 - N_D(t)} / p_I^{\text{half}}\right)^2} & \text{when } p_I^{\text{half}} > 0 \\ \kappa_0 & \text{when } p_I^{\text{half}} = 0 \end{cases} \quad (\text{A.10})$$

201 even though, from a continuity point of view, the top part of this expression  
 202 implies that  $\kappa(t) \rightarrow 0$  at  $p_I^{\text{half}} \rightarrow \infty$ .

### 203 Probability of infection

204 In deriving a probability  $\pi_{ih,j\ell}^{\text{inf}}$  of an agent  $\mathbf{A}_h$  being infected with strain  $\ell$   
 205 by and agent  $\mathbf{A}_i$  who is infectious with major strain  $j$ , we concatenate (i.e.,  
 206 multiply together) several process, each of which involves nominal constants.  
 207 Thus, in all but one of these processes, the scaling of these constants can be  
 208 normalized and given a relative set of values across strains though one set of

209 constants though relative, will ultimately all be scaled by fitting the model to  
 210 real data. In our treatment below, constants associated with shedding and per-  
 211 sistence will be scaled while those associated with within-host replication will be  
 212 kept unscaled to be ultimately fitted to data. In particular, the parameters  $\bar{\beta}_j$   
 213 associated with pathogen transmission (i.e., from contact to the start of within  
 214 host replication—see Fig. 1) will be scaled by fitting to epidemiological data,  
 215 while the relative values for the different strains regarding pathogen shedding  
 216 and environmental persistence can be fitted to experimental data collect to set  
 217 values of these processes when considered on their own.

218  
 219 Pathogen shedding. We assume that shedding is affected by the immune state  
 220 of the infector  $A_i$  and thus posit the shedding rates below for this individual  
 221 when its major infectious strain is  $j$ . In general, we have a matrix of shedding  
 222 rates  $\bar{\zeta}_{j\ell}$  before accounting for immunity and cross immunity that is specific to  
 223 agent  $A_i$ . Immunity and cross-immunity act to reduce shedding rates through  
 224 functions  $\phi_{ij}(t) \in [0, 1]$  that are computed in terms of  $A_i$ 's waning functions  
 225  $\omega_{im}$  with respect to strain  $m$  and a matrix of cross-immunity values  $c_{jm}$  that  
 226 have been normalized so that  $c_{jj} = 1$  for  $j = 0, \dots, 2^J - 1$  and  $c_{jm} \in [0, 1]$  for  
 227  $j, m = 0, \dots, 2^J - 1$ . Specifically, we define agent-specific *immunity modifying*  
 228 *functions*

$$\phi_{ij}(t) = \prod_{m=0}^{2^J-1} (1 - c_{mj}\omega_{im}(t)) \quad (\text{A.11})$$

229 and assume that the shedding rates can be expressed as

$$\zeta_{ij\ell}(t) = \bar{\zeta}_{j\ell}\phi_{i\ell} \quad \ell = 0, \dots, 2^J - 1 \quad (\text{A.12})$$

230 Environmental persistence. The persistence of pathogens in the environment  
 231 are known to be impacted by humidity, temperature, airflow, and the surface  
 232 properties of fomites [57]. This, and other factors relating the effects of weather  
 233 on contact rates and efficacy, may result in overall pathogen transmission having  
 234 a seasonal component to it [58]. In particular, viral persistence indoors may  
 235 be much greater than outdoors, with a greater proportion of indoor contacts  
 236 taking place during cold or wet weather. Thus the most appropriate place  
 237 to introduce seasonal effects into epidemic processes is through contact rates  
 238 and environmental persistence cycling over time with a period of one year (or  
 239 even half-a-year if two comparatively spaced rainy seasons occur, as in some  
 240 in tropical locations [59]) and an amplitude obtained by fitting parameters to  
 241 data. Thus, in our model, we introduce constants  $\bar{\eta}_\ell$ ,  $\delta \in (0, 1)$ ,  $k$  (appropriately  
 242 scaled, depending on the units of time) and  $\theta$  and assume that

$$\eta_\ell(t) = \bar{\eta}_\ell \left( 1 + \delta \sin \left( \frac{2\pi t}{k} + \theta \right) \right) \quad \ell = 0, \dots, 2^J - 1 \quad (\text{A.13})$$

243 The case  $\delta = 0$  corresponds to constant values  $\eta_\ell(t) = \bar{\eta}_\ell$  for all  $t$ , while if  
 244  $\delta = 1$  we get the largest possible fluctuation between 0 and  $2\bar{\eta}_\ell$ . The constant  $k$   
 245 relates to the time units so we get one cycle per year, and  $\theta$  shifts the cycle to  
 246 set the points in time at which the maximum and minimum values of  $\eta_\ell(t)$  occur.

247

248 Strain transmission. In the context of a standardized dose (which will be  
 249 modified by multiplying the strain *effective contact* and transmission by both  
 250 pathogen shedding and environmental persistence functions), the differential  
 251 rates of strain transmission, which we denote by  $\beta_{h\ell}$ , will depend on a constant  
 252 strain transmission rate parameter  $\bar{\beta}_\ell$  modified by a function that represents  
 253 the immune state of the infectee at time  $t$ : viz., recalling Eq. A.11

$$\beta_{h\ell}(t) = \bar{\beta}_\ell \phi_{h\ell}(t), \quad \ell = 0, \dots, 2^J - 1 \quad (\text{A.14})$$

254 Probability of infection. Using a competing rates formulation [60] to compute  
 255 the probability of infection as a concatenation of the process of infector shedding  
 256 ( $\zeta$ ), environmental persistence ( $\eta$ ) and transmission rates ( $\beta$ ), we obtain

$$\pi_{ih,j\ell}^{\text{inf}}(t) = \frac{\zeta_{ij\ell}(t)\eta_\ell(t)\beta_{h\ell}(t)}{\sum_{m=0}^{2^J-1} \zeta_{ijm}(t)\eta_m(t)\beta_{hm}(t)} \left(1 - e^{-\zeta_{ij\ell}(t)\eta_\ell(t)\beta_{h\ell}(t)}\right), \quad \ell = 0, \dots, 2^J - 1 \quad (\text{A.15})$$

### 257 **Within-host processes**

258 If after receiving an initial infectious dose of pathogen, an individual is infected  
 259 primarily with strain  $\ell$ , then we expect this strain to dominate unless intrinsic  
 260 mutational processes are high (which is not the case for COVID-19) or the  
 261 individual has some immunity to this dominant strain. In the latter case the  
 262 situation is ripe for an “escape mutation,” that is one that evades the immune  
 263 system, to arise.

264 If we nominally set the relative rate at which an individual invaded by strain  
 265  $\ell$  has an infection dominated by strain  $\ell$  (i.e.,  $\ell$  in the terminology of [61] is  
 266 the major strain of the infection) to be  $(1 - \mu)$ , then the probability that one  
 267 of the other strains  $\ell' \neq \ell$  (in the case of COVID we assume that  $\mu > 0$  is  
 268 very close to 0—e.g. of order  $10^{-3}$  to  $10^{-6}$ —while for viruses lacking error  
 269 correcting machinery it can be considerably larger and of the order  $10^{-1}$ ). We  
 270 can partition the latter probability according to a set of comparative strain  
 271 within-host replication rates  $\lambda_{\ell'}$ , each moderated by its immune state function  
 272  $\phi_{h\ell'}$  and a normalizing factor  $\frac{1}{\sum_{m \neq \ell} \lambda_m \phi_{hm}}$  to obtain

$$\pi_{h\ell\ell'}^{\text{inv}}(t) = \begin{cases} 1 - \mu & \text{for } \ell' = \ell \\ \mu \left( \frac{\lambda_{\ell'} \phi_{h\ell'}}{\sum_{m \neq \ell} \lambda_m \phi_{hm}} \right) & \text{for } \ell' \neq \ell \end{cases} \quad (\text{A.16})$$

### 273 **Pathogen progression equations**

274 Probability that infector  $A_i$  with major strain  $j$  will result in infectee  $A_h$  express  
 275  $\ell'$  as its major strain is

$$\pi_{ih,j\ell'}(t) = \sum_{\ell=0}^{2^J-1} \pi_{ih,j\ell}^{\text{inf}}(t) \pi_{h\ell\ell'}^{\text{inv}}(t), \quad \ell = 0, \dots, 2^J - 1 \quad (\text{A.17})$$

276 **Single strain case**

277 In the single strain case ( $J = 0$ ), the waning immunity equation Eq. A.6 reduces  
 278 to (dropping the redundant index  $j = 0$ , and noting that the existence of a value  
 279  $\tau_i$  implies  $A_i$  has been infected at time  $\tau_i$  in the past)

$$\omega_i(t) = \begin{cases} 0 & \text{if } A_i \text{ has never been infected} \\ \frac{1}{1 + ((t - \tau_i - \sigma_I - \sigma_E)/t^{\text{half}})^\sigma} & \text{if } t \geq \tau_i + \sigma_I + \sigma_E \\ 1 & \text{if } t < \tau_i + \sigma_I + \sigma_E \end{cases} \quad (\text{A.18})$$

280 and the modifying immunity functions  $\phi_{ij}$  (Eq. A.11) collapse to 1, which implies  
 281 that the pathogen shedding functions  $\zeta_{il}$  (Eq. A.12) collapse to 1. Without loss  
 282 of generality, we can also assume that single strain value  $\eta = 1$  in Eq. A.13,  
 283 which implies that the probability of infection (Eq. A.15) reduces to

$$\pi_{ih}^{\text{inf}}(t) = 1 - e^{-\bar{\beta}(1-\omega_h(t))} \quad (\text{A.19})$$

284 Further, since in the single strain case there are no mutations to consider, it  
 285 follows from Eq. A.16 that  $\pi_{h\ell'}^{\text{inv}}(t) = 1$  for all  $h$  and we finally have that  $\pi_{ih}(t) =$   
 286  $\pi_{ih}^{\text{inf}}(t) = 1 - e^{-\bar{\beta}(1-\omega_h(t))}$  (Eq. A.17) for all  $h$ .

287 **Simulation algorithm**

288 **1. Parameters selected at the start of a simulation**

- 289 (a)  $N_0$ : Number of individuals in the population. Assumed to be fixed  
 290 over time (i.e., the population is closed), but partitioned into sets **S**,  
 291 **A** and **D** with respectively  $N_S(t)$ ,  $N_A(t)$  and  $N_D(t)$  individuals in  
 292 each set and satisfying Eq. A.1.
- 293 (b)  $J$ : The  $\log_2$  of the number of possible strains indexed by  $j = 0, \dots, 2^J -$   
 294 1
- 295 (c)  $\bar{\beta}_j$ : Strain dependent transmission parameters (the process between  
 296 contact and the start of strain replication and nominally equivalent  
 297 to transmission in SEIR models—see Fig. 1) for pathogen strain  $j$
- 298 (d)  $t_j^{\text{half}}$ : The time it takes for immunity to strain  $j$  to have waned by  
 299 half.
- 300 (e)  $\sigma_{E_j}$ : The time it takes from initial infection for an infected individual  
 301 to become more likely to become infectious than remain infected  
 302 without being infectious.
- 303 (f)  $\sigma_{I_j}$ : The additional time it takes beyond  $\sigma_{E_j}$  for an infectious indi-  
 304 vidual to more likely transition beyond being infectious than remain  
 305 infectious.
- 306 (g)  $p_{\alpha_j}$ : The proportion of individuals leaving the infectious category  
 307 that die, which implies that  $1 - p_{\alpha_j}$  is the proportion that become  
 308 immune.

309 **2. Initialization**

- 310 (a) Set up pathogen list (see Eq. A.2)  
 311 (b) Initialize the simulation by setting  $t = 0$  and creating the agent list  
 312  $\mathbf{A}(0)$  one infectious and  $N_0 - 1$  susceptible agents.

313 **3. Time  $t$ : vaccination loop.**

- 314 (a) Carry out the vaccination process before going into the rest of the  
 315 loops with the updated S and A sets after the vaccinations.

316 **4. Time  $t$ : contact loop.** Set up contacts for the current round of en-  
 317 counters at time  $t$  (i.e., the inner agent-driven contact loop within the  
 318 outer time-driven loop) and tag for outer loop update of disease status, as  
 319 follows:

320 (a) *Numbers in various sets and associated index sets.* Identify the num-  
 321 ber of individuals  $N_S(t)$ ,  $N_A(t)$  and  $N_D(t)$  in sets  $\mathbf{S}$ ,  $\mathbf{A}$  and  $\mathbf{D}$  at  
 322 time  $t$  respectively, as well as the number of exposed (but not yet  
 323 infectious) agents  $N_E(t)$ , infectious agents  $N_I(t)$  and identified non-  
 324 infected agents  $N_{AS}(t) = N_A(t) - N_I(t) - N_E(t)$ . Break down the  
 325 infectious agents tally into the number of agents  $N_{I_j}$  infectious with  
 326 strain  $j = 0, 1, \dots, 2^J - 1$ . We will also need the index sets  $\mathbb{I}_{AS}$  and  
 327  $\mathbb{I}_{I_j}(t)$ ,  $j = 0, \dots, 2^J - 1$  at time  $t$ .

(b) *Infectious contacts with each group.* The rate at which any individual  
 contacts other individuals per unit time is given by the contact rate  
 parameter  $\kappa > 0$ . Assuming random contact events over one unit  
 of time, the actual number of individuals that agent  $A_i$  contacts at  
 time  $t$  is then given by

$$\hat{\kappa}_i(t) \sim \text{POISSON}[\text{mean} = \kappa(t)]$$

328 Of these, proportions

$$\pi_{iS} = \frac{N_S(t)}{N_0 - N_D(t)} \quad (\text{A.20})$$

329 and

$$\pi_{iA} = \frac{N_A(t) - N_I(t) - N_E(t)}{N_0 - N_D(t)} \quad (\text{A.21})$$

330 are expected to come from susceptibles in the sets  $\mathbf{S}(t)$  and  $\mathbf{A}_S(t)$   
 331 (see Eq. A.5) respectively. Thus the actual number of contacts in set  
 332  $\mathbf{S}(t)$ ,  $\mathbf{A}_S(t)$ , and  $\mathbf{E}(t) \cup \mathbf{I}(t)$  are

$$\left( \hat{N}_i^S(t), \hat{N}_i^{AS}(t), \hat{N}_i^E(t) + \hat{N}_i^I(t) \right) = \text{Multinomial}[\hat{\kappa}_i; \pi_{iS}, \pi_{iA}, 1 - \pi_{iS} - \pi_{iA}] \quad (\text{A.22})$$

333 We note that only  $\hat{N}_i^S(t)$  and  $\hat{N}_i^{AS}(t)$  are of interest because indi-  
 334 vidual in states E and I cannot be reinfected. Also, we make the  
 335 assumption below that the first infection that an individual in set  $\mathbf{A}$   
 336 contracts in this contact loop, is the one that counts (i.e., there will

337 be no simultaneously infections with multiple strains). Finally, since  
 338 contacting individuals is tantamount to sampling with replacement,  
 339 the number of unique contacts (i.e., all multiple contacts are counted  
 340 as a single contact) that agent  $A_i$  has with individuals in the set  $\mathbf{S}$  is  
 341  $\hat{N}_i^S(t)$  reduced by excluding multiple contacts (which under a random  
 342 contact model is a negative exponential correction) to obtain

$$N_i^{S*}(t) = \min \left\{ \hat{N}_i^S(t), \text{Binomial} \left[ \hat{\kappa}_i(t), e^{-\hat{\kappa}_i(t)/\hat{N}_i^S(t)} \right] \right\} \quad (\text{A.23})$$

343 Thus if  $\hat{\kappa}_i(t) \ll \hat{N}_i^S(t)$ ,  $N_i^{S*}(t)$  is expected to be very close to the  
 344 upper value  $\hat{\kappa}_i(t)$ . On the other hand, if  $\hat{\kappa}_i(t) \approx \hat{N}_i^S(t)$ , then  $N_i^{S*}(t)$  is  
 345 expected to be around  $\hat{\kappa}_i(t)/e \approx 0.37\hat{\kappa}_i(t)$ . Additionally, after dealing  
 346 with each agent  $i$  reduce in the size of  $N_S(t)$  to take account of those  
 347 agents that had been infected by agent  $A_i$  and had now entered the  
 348 ranks of the set  $\mathbf{A}$ .

- (c) *Identify all infectious agents and their pathogens strains.* Among all agents in the set  $\mathbf{A}(t)$  (Eq. A.4), identify those that have an infectious strain  $I_j$  for some  $j = 0, \dots, 2^J - 1$ . Thus, if the number of infectious agents with infectious strain  $j$  is  $N_{I_j}(t)$  then consider the set

$$\mathbf{I}_j(t) = \{A_{i_1}^j(t), A_{i_2}^j(t), \dots, A_{N_{I_j}(t)}^j(t)\}$$

with index set

$$\mathbb{I}_j(t) = \{i_{1_j}, \dots, i_{N_{I_j}(t)}\}$$

349 Initially, most of these sets will be empty, but will fill in over time.

- 350 (d) *Susceptible contacts.* The probability that an agent  $A_i$  with a strain  
 351  $j$  major infection infects a susceptible (nominally denoted by individ-  
 352 uals of type  $A_0$ ) who then becomes infectious with dominant strain  $\ell'$   
 353 is given by the probability  $\pi_{i0,j\ell'}$  computed in Eq. A.17, which itself  
 354 relies on expressions Eq. A.10-A.16. The actual number of individ-  
 355 uals in the set  $\mathbf{S}$  will make effective contact with one more infectious  
 356 individuals is  $N_i^{S*}(t)$  obtained using Eq. A.23. Thus, from a multi-  
 357 nomial drawing, we can now generate the number of newly exposed  
 358 individuals,  $N_{0\ell'}^{E+}(t+1)$  (the “+” is used to denote these are newly  
 359 added and the “0” that they are coming from the set  $\mathbf{S}$ ), with major  
 360 strain  $\ell'$  at time  $t+1$ , have been infected by agent  $A_i$  with major  
 361 pathogen strain  $j$  on the time interval  $[t, t+1)$ :

$$\begin{aligned} (\hat{N}_{00}^{E+}(t), \dots, \hat{N}_{02^J-1}^{E+}(t)) &\sim \\ &\text{Multinomial} \left[ N_i^{S*}(t); \pi_{i0,j0}(t), \dots, \pi_{i0,j2^J-1}(t) \right] \end{aligned} \quad (\text{A.24})$$

362 These individuals will be used to update list of currently infected  
 363 individuals in the sets  $\mathbf{A}_{E_j}$ ,  $j = 0, \dots, 2^J - 1$  at time  $t+1$ , which is  
 364 computed in the outer loop computation, as presented below. We also  
 365 note that the probabilities in the above multinomial add to less than  
 366 1, so that at the end of the drawing a proportion of the individuals  
 367  $N_i^{S*}(t)$  remain uninfected.

368 (e) *Agent contacts.* The number of agents  $\hat{N}_i^{\text{As}}(t) \in \mathbb{I}_{A \setminus (\text{E} \cup \text{I})}$  that come  
 369 into contact with agent  $A_i$  over the interval  $(t, t + 1)$  is given by  
 370 Eq. A.22. This number is drawn from the set  $\mathbb{I}_{A \setminus (\text{E} \cup \text{I})}$  with replace-  
 371 ment and the following multinomial computation is used to determine  
 372 how to update agent  $A_h$  at time  $t + 1$  when coming into contact with  
 373 agent  $A_i$  on the interval  $(t, t + 1)$  using the probabilities of transmis-  
 374 sion given in Eq. A.17. Specifically, agent  $A_h$  will become infected  
 375 with major strain  $\ell'$  at time  $t + 1$  is determined by the multinomial  
 376 drawing

$$A_h \in \mathbf{A}_{E_j} \text{ for some } j \sim \text{Multinomial} [1; \pi_{ih,j0}(t), \dots, \pi_{ih,j} 2^{J-1}(t)] \quad (\text{A.25})$$

377 We note here that since the agents  $A_h, h \in \mathbb{I}_{A \setminus (\text{E} \cup \text{I})}$  are drawn with  
 378 replacement as the computation proceeds and the agents  $A_i, i \in \mathbb{I}$  are  
 379 cycled through, if a previously drawn  $A_h$  is drawn again, but has already  
 380 been infected in the current round then we ignore the latest event, but keep  
 381 the previous infection event intact. To obviate bias in this procedure, we  
 382 need cycle through the agents  $A_i, i \in \mathbb{I}$  at random rather than in numerical  
 383 order.

384 **5. Time  $t$ : disease progression loop.**

385 (a) *Individuals in  $\mathbf{A}_E$  at time  $t$ .* An individual  $A_i \in \mathbf{A}_E$  at time  $t$  and in  
 386 state  $E_j(t, \tau_i), j = 0, \dots, 2^J - 1$ , becomes either an individual in state  
 387  $E_j(t + 1, \tau_i)$  with probability

$$\pi_{E_j}(t) = \frac{1}{1 + \left(\frac{t - \tau_i}{\sigma_{E_j}}\right)^4} \quad (\text{A.26})$$

388 or transfers to state  $I_j(t + 1, \tau_i)$  with probability  $(1 - \pi_{E_j}(t))$  thereby  
 389 entering class  $\mathbf{A}_I$  at time  $t + 1$ .

390 (b) *Individuals in  $\mathbf{A}_I$  at time  $t$ .* An individual  $A_i \in \mathbf{A}_I$  at time  $t$  and in  
 391 state  $I_j(t, \tau_i), j = 0, \dots, 2^J - 1$ , becomes either an individual in state  
 392  $I_j(t + 1, \tau_i)$  with probability

$$\pi_{I_j}(t) = \frac{1}{1 + \left(\frac{t - \tau_i}{\sigma_{E_j} + \sigma_{I_j}}\right)^4} \quad (\text{A.27})$$

393 or leaves the set  $I_j(t + 1, \tau_i)$  with probability  $(1 - \pi_{I_j}(t))$ . In this  
 394 latter case, the individual either dies with probability  $p_{\alpha_j}$  or enters  
 395 the state  $V_j(t + 1, \tau_i)$  at time  $t + 1$  with probability  $1 - p_{\alpha_j}$ . The total  
 396 number of individuals dying over the interval  $[t, t + 1)$  is noted as  
 397 having a value  $\Delta N_D(t)$ .

398 **6. Time  $t + 1$ : outer loop update.** The outer loop records all the events  
 399 that took place in the contact and disease progression loops and updates  
 400 the agents state at the next time step. It also updates all other states as  
 401 follows.



- (a) *Individuals in  $\mathbf{A}_S$  at time  $t$ .* For the  $N_S(t)$  individuals in  $\mathbf{A}_S$  at time  $t$ , we have  $N_{0j}^{E+}(t)$  enter set  $\mathbf{A}_{E_j}(t+1)$  and we update

$$N_S(t+1) = N_S(t) - \sum_{j=0}^{2^J-1} N_{0j}^{E+}(t)$$

402

where Eq. A.23 ensures that  $N_S(t+1) \geq 0$

403

- (b) *Individuals in  $\mathbf{A}_S$  that are infected again over  $[t, t+1)$ .* These individuals can become reinfected as calculated in the contact loop. Those that become reinfected with strain  $j$ ,  $j = 0, \dots, 2^J - 1$  enter state  $\mathbf{E}_j(t+1, t+1)$  at time  $t+1$ .

404

405

406

407

408

409

410

- (c) *Updating the immunity of individuals in  $\mathbf{A}_S$ .* Every individual within  $\mathbf{A}_S$  at time  $t$  must have its immunity status updated so that for  $j = 0, \dots, 2^J - 1$ , if  $A_i$  is in state  $V_j(t, \tau_{ij})$  at time  $t$  then it transfers to state  $V_j(t+1, \tau_{ij})$  at time  $t+1$ , even if reinfected, as in b.) above.

411

412

413

414

415

- (d) *Transfer from  $\mathbf{S}$  to  $\mathbf{A}$ .* The  $\hat{N}_{0j}^E(t)$  computed in Eq. A.24 become newly listed members of the set  $\mathbf{A}$  by entering state  $\mathbf{E}_j(t+1, t+1)$ ,  $j = 0, \dots, 2^J - 1$ . This involves updating the equations for  $N_S(t)$  and  $N_A(t)$ , including taking account of the number of individuals  $\Delta N_D(t)$  that died from the disease in the immediate time period, i.e.:

$$\begin{aligned} N_S(t+1) &= N_S(t) - \sum_{j=0}^{2^J-1} \hat{N}_{0j}^E(t) \\ N_A(t+1) &= N_A(t) + \sum_{j=0}^{2^J-1} \hat{N}_{0j}^E(t) - \Delta N_D(t) \\ N_D(t+1) &= N_D(t) + \Delta N_D(t) \end{aligned} \quad (\text{A.28})$$

416

417

418

419

420

421

422

- (e) Along with input parameter values  $t_{\text{vac.on}} \geq 0$ ,  $t_{\text{vac.off}}$  and  $p_v \in [0, 0.1]$ , we also need to specify the valency of the vaccination by selecting 1 to 4 numbers that take on values  $0, \dots, 2^J - 1$  (if more valencies are needed than 4, then the platform needs to be modified accordingly). We also need specify whether  $N_{\text{select}}$  will just be individuals in the set  $\mathbf{S}(t)$  ( $N_{\text{select}} = N_S$ ) or will be any individual other than those in the set  $\mathbf{A}_I(t)$  ( $N_{\text{select}} = N_S + N_A - N_I$ ).

423

424

425

426

427

428

429

In Algorithm 1 we summarise the steps of the simulation algorithm, as described in this section. On the right we report the name and numbering of the subsections while in the for loops we list the various steps respecting the item letters. Note that technical steps not explicitly described in the text (e.g. store updates, store set progression) do not present letters or numbers. The time set is defined with  $T$  while to describe temporal progression of set  $\mathbf{S}$ ,  $\mathbf{A}$  and  $\mathbf{D}$  we use the symbols  $\mathcal{S}$ ,  $\mathcal{A}$ ,  $\mathcal{D}$  respectively.

430

## Estimation of $R_0$ .

431

432

In a continuous time, SEIR model, when  $\kappa$  is folded into an all encompassing frequency-dependent transmission rate parameter  $\beta_\kappa = \beta\kappa > 0$  (i.e.,

**Algorithm 1:** Summary of simulation algorithm

```

input  $N_0, J, \bar{\beta}_j, t_j^{\text{half}}, \sigma_{E_j}, \sigma_{I_j}, p_{\alpha_j}, j = 0, \dots, 2^J - 1$  // 1)
  parameters
   $\{(\bar{\eta}_j, \bar{\beta}_j, \lambda_j, p_{\alpha_j}; \zeta_{jm} \text{ and } c_{jm} \text{ for } m = 0, \dots, 2^J - 1)\}$  // 2a) pathogen
   $| j = 0, \dots, 2^J - 1\}$  // list
   $t = 0, N_I(0) = 1, N_S(0) = N_0 - 1$  // 2b) initialization
  for  $t$  in  $T$  do
    if  $N_I > 0$  then
      for  $agent$  in  $\mathbf{S} \cup (\mathbf{A} \setminus \mathbf{I})$  do // 3) vaccination loop
        3a) Vaccination process
        Update  $N_S$  and  $N_A$ 
      for  $agent$  in  $\mathbf{I}$  do // 4) contact loop
        4a) Numbers in various sets and associated index sets
        4b) Infectious contacts with each group
        4c) Identify all infectious agents and their pathogens strains
        4d) Susceptible contacts
        4e) Agent contacts
        Store updates
      for  $agent$  in  $\mathbf{E}$  do // 5a) disease progression loop
        5a) Individuals in  $\mathbf{A}_E$  at time  $t$ 
        Store updates
      for  $agent$  in  $\mathbf{I}$  do // 5b) disease progression loop
        5b) Individuals in  $\mathbf{A}_I$  at time  $t$ 
        Store updates
      Updates from loops 4), 5a) and 5b)
      6a) Individuals in  $\mathbf{A}_S$  at time  $t$  // 6) updates in outer loop
      6b) Individuals in  $\mathbf{A}_S$  that are infected again over  $[t, t + 1)$ 
      6c) Updating the immunity of individuals in  $\mathbf{A}_S$ 
      6d) Transfer from  $\mathbf{S}$  to  $\mathbf{A}$ 
      6e) Specify the valency of the vaccination
       $\mathcal{S}[t] \leftarrow \mathbf{S}(t)$  // store set progression
       $\mathcal{A}[t] \leftarrow \mathbf{A}(t)$ 
       $\mathcal{D}[t] \leftarrow \mathbf{D}(t)$ 
    return  $\mathcal{S}, \mathcal{A}, \mathcal{D}$ 

```

433 total is transmission given by  $\frac{\beta SI}{N}$  [49, 50]),  $\gamma > 0$  is the transition rate  
434 from E to I and  $\rho > 0$  is recovery rate from I to R, then  $R_0$  corresponds  
435 to [62]

$$R_0 = \frac{\beta \kappa}{\gamma + \rho} \quad (\text{A.29})$$

## 436 B J-RAMP Details

### 437 General description

438 The J-RAMP design augments a desktop simulation platform with several novel  
439 features that increase flexibility and expressiveness, and promote experimenta-  
440 tion and interoperability with other platforms. These include an API (“appli-  
441 cation programming interface”) fully supporting remote operation and direct  
442 retrieval of data for external processing on other platforms, such as Python,  
443 Javascript or the R statistical platform. The API can also be accessed by an  
444 onboard scripting interface that uses the Nashorn Javascript engine.

445 Additionally, using a novel design, elements of the internal algorithm are  
446 exposed for possible reprogramming in a secure fashion that will not damage  
447 the overall system. These runtime alternative modules (RAMs) may also be  
448 controlled from the API to facilitate selective algorithm redefinition during the  
449 run of the simulation.

450 Use of the J-RAMP features require some experience with scripting and/or  
451 Java coding, however the resulting modifications to the algorithm can be of great  
452 significance. The RAM platform is implemented to support program redefinition  
453 with no risk to damaging the underlying code base. It should be accessible to  
454 anyone with moderate scripting experience.

455 A major goal of the J-RAMP project is to pre-package these functionalities so  
456 that they can be readily deployed as part of simulation system design. This goal  
457 has been partially realized with respect to the RAM platform: annotations can  
458 be added to the simulator’s source code that direct the automatic generation of  
459 Java code to integrate into the simulations’s source and provide the functionality.

460 The following discussion assumes some familiarity with script or program  
461 development.

### 462 Runtime alternative modules

463 Figure B.1 shows the RAM redefinition frame. The available RAMs appear as  
464 radio buttons along the bottom of the frame. Each RAM is a set of options  
465 for defining a relatively short Java method implementing some key aspect of  
466 the simulation algorithm. For example, included in this simulation are the  
467 implementation for cross immunity given in Eq. 1; the implementation for  $\beta$   
468 given in Eq. A.14; and the implementation for  $\phi$  given in Eq. A.11; etc. Each  
469 RAM initially contains only a single option, Option 0, the default, internally  
470 defined implementation. Option 0 cannot be edited and appears for reference  
471 purposes only.

472 Additional options may be added to each RAM containing code redefining  
473 the method. Two editor panes and one console pane are stacked in the frame

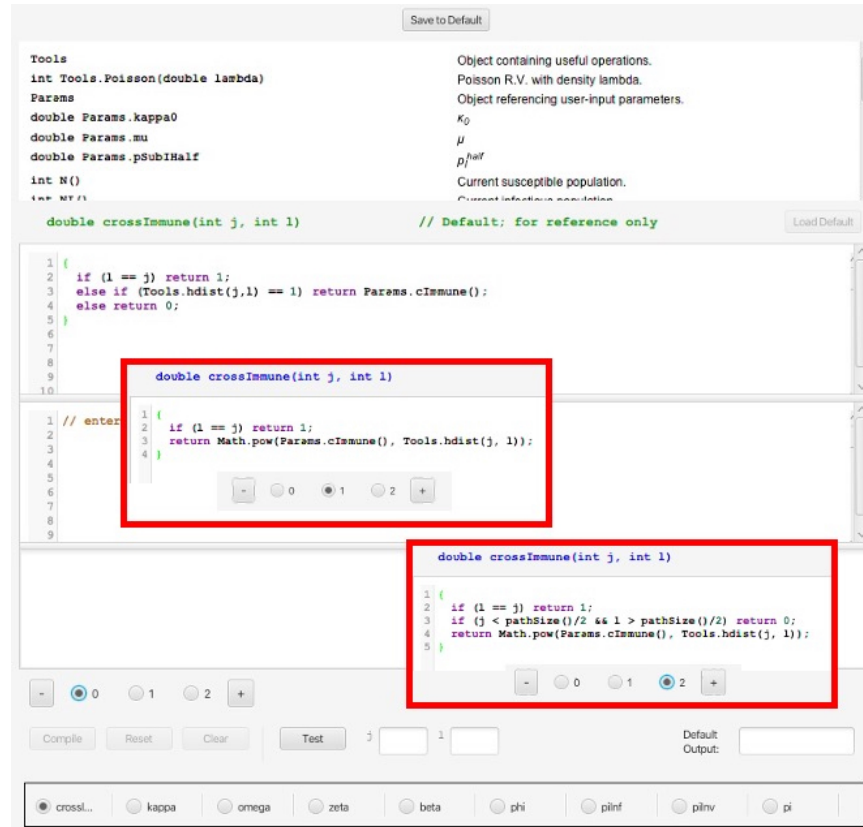

Figure B.1: RAM frame shows the implementation of the nearest-neighbor cross-immunity formulation  $\mathbf{C}$  of Eq. 1 as the default. In the red-bordered insets are the cascading cross-immunity with escape mutation formulations of Eqs. A.7 and A.9. Note the radio-buttons are set to 0 in the main figure and to 1 and 2 in the insets. Also note the “+” button which allows for an unlimited number of alternatives to be set up using consecutive integer numbers for the new radio-buttons that appear and pertain to the selection of each alternative. Note at the bottom the list of functions that can be altered at runtime. The “load default” button on the upper left hand side allows the user, when starting a new alternative, to insert the default code (which is immutable in radio-button 0) as a starting point. The frame also documents a list of terms in the upper panel that can be used to build any function.

474 and display the code and output of the RAM. These panes show the content  
475 associated with the currently selected RAM and option. The top editor pane  
476 contains the code for the method being redefined. The second editor pane  
477 contains definitions of any new help functions required by the definition in the top  
478 pane. The console pane contains messages and output that are useful during the  
479 development of the option. For convenience, a “Load Default” button initializes  
480 the editor to an editable version of the Option 0 default to use as a starting  
481 point.

482 Figure B.1 shows the Option 0 default definition for the cross immunity

483 matrix function, as described by Eq. 1. Clicking the “+” button produced two  
484 new options, which appear in the insets. These option implement the alternative  
485 cascading cross immunity schemes presented in Eqs. A.7 and A.9. Option 2 code  
486 appears below:

```
487     double crossImmune(int j, int k)  {  
488         if (l == j) return 1;  
489         if (j < pathSize()/2 && l > pathSize()/2) return 0;  
490         return Math.pow(Params.cImmune(), Tools.hdist(j, l));  
491     }
```

492 Note that we have substituted the function `pathSize` for a hard-coded value  
493 of 63. `pathSize` returns the number of pathogens, allowing us to use this  
494 formulation for any choice of entropy. Documentation for `pathSize` is at the  
495 top of the window in the list of available help functions and parameters. There  
496 is also more extensive documentation in a separate user guide (see Fig. B.2).

497 The platform duplicates a mini-development environment for building alter-  
498 native definitions. Once code has been entered the “Compile” button checks  
499 the legality of the code and makes it available for use at runtime. Legally com-  
500 piled code will produce a “Compilation Successful” message. Errors will appear  
501 with line numbers if they occur. Once the code is legal, the “Test” button can  
502 be used with actual parameters entered into the small text fields to determine  
503 correctness of the code. It is also possible to include `print` and `println` state-  
504 ments in the code during development to further check correctness. Output  
505 from print statements will appear in the bottom console window. The entire  
506 RAM set can be saved and will reappear during subsequent launches of the  
507 simulator platform.

508 To use an alternate RAM definition at runtime simply select the desired  
509 option. (Selected options will be restored from a saved RAM set during subse-  
510 quent launches.) The system will compile any uncompiled code the first time it  
511 is accessed. If an error occurs during a runtime compilation an alert will notify  
512 the user that the system is returning to the default definition of that RAM. At  
513 no time is the internal logic of the program overridden.

514 Finally, RAM option selection is part of the API described in the next sec-  
515 tion. This means that a script may run a simulation selecting different options  
516 at different points in time, using logic that considers the state of the model. For  
517 example, such an adaptive protocol might be appropriate for determining the  
518 contact rate  $\kappa$ .

## 519 Application programming interface

520 The API is a simple bytecode<sup>1</sup> called BPL (Blackbox Programming Language)  
521 that addresses all available user interactions with the simulator. Instructions  
522 fall into three categories: parameter assignment and retrieval; simulator oper-  
523 ation; and data retrieval. A complete list of instructions is shown in Fig. B.3.  
524 Instructions are comprised of opcodes (e.g., `reset`, `step`, `get`) followed by 0  
525 or more arguments. Every BPL operation returns a result, even if empty, for

<sup>1</sup>a *bytecode* is computer source code that is processed immediately by a program, usually referred to as an interpreter or virtual machine.

## J-RAMP SEIVD IBM A-Mod Guide

rms wgetz

May 2021

$\omega$  (Equation 9)

$$\omega_{ij}(t) = \begin{cases} 0 & \text{if } V_j \text{ is null} \\ \frac{1}{1 + ((t - \tau_{ij} - \sigma_I - \sigma_E)/t_j^{\text{half}})^\sigma} & \text{if } t \geq \tau_{ij} + \sigma_I + \sigma_E \\ 1 & \text{if } t < \tau_{ij} + \sigma_I + \sigma_E \end{cases}$$

Code

```
double omega(int i, int j)
{
    if (i == 0) return 0.0; // Special case; A_0 never infected
    InfectedAgentState astate = getStateOf(i, j);
    if (astate == null || !(astate instanceof V)) return 0.0;
    double tau = tau(i,j);
    double sigI = sigmaI(j);
    double sigE = sigmaE(j);
    double timeSinceInfect = tau + sigI + sigE;
    if (time() <= timeSinceInfect) return 1.0;
    return 1/(1 + Math.pow((time() - timeSinceInfect)/tHalf(j), Params.sigma()));
}
```

Notes

|                                                                                                                                  |                                                                                                                                                                                                                                                                                                                              |
|----------------------------------------------------------------------------------------------------------------------------------|------------------------------------------------------------------------------------------------------------------------------------------------------------------------------------------------------------------------------------------------------------------------------------------------------------------------------|
| <pre>astate = getStateOf(i,j) astate == null    !(astate == V) tau(i,j) sigmaI(j) sigmaE(j) tHalf(j) time() Params.sigma()</pre> | <pre>astate is assigned to a Java InfectedAgentState object for agent i with respect to pathogen j. InfectedAgentState objects can either be state E, I, V or null (the latter for never-infected or dead agents.) astate is something other than state V. = tau_ij. = sigma_I. = sigma_E. = tau_j^half. = t. = sigma.</pre> |
|----------------------------------------------------------------------------------------------------------------------------------|------------------------------------------------------------------------------------------------------------------------------------------------------------------------------------------------------------------------------------------------------------------------------------------------------------------------------|

Figure B.2: A description from our User Guide of the immunity waning function  $\omega$ .

526 synchronization purposes. A string consisting of a sequence of opcodes and  
 527 arguments may be submitted to the BPL interpreter, an example of which is  
 528 shown in the notes in Fig. B.3.

529

530 **Parameter assignment and retrieval.** Every user-configurable element (in-  
 531 cluding random number generator seeds) is addressed from BPL using a unique  
 532 three-letter “airport code” (see Table. B1). Additionally, pathogens are ad-  
 533 dressed by their id number (0 to  $2^J - 1$ ) and agent states using identifiers S, E,  
 534 I, V, DI+ and DD (the latter two represent  $\Delta I$  and  $\Delta D$ , respectively). RAM  
 535 options are addressed in `setOption` and `getOption` using the name of the RAM  
 536 (e.g., “crossImmune”). Get and set operations can be used on each of these with  
 537 the exception of ENT (strain entropy), which is read-only.

538

539 **Simulator operation.** Simulation runs begin by executing the BPL `reset`  
 540 instruction, followed by `step`, `run_for` or `run`. The BPL interpreter operates  
 541 synchronously with the simulator by waiting to process subsequent commands  
 542 during a simulation run. Operational instructions can be interspersed with pa-  
 543 rameter set/get or data retrieval to use in runtime decision-making. Note that  
 544 the `reset` operation restores the simulator to its state at the time of the last  
 545 `reset`, so that no parameter changes made during a run are persistent.

546  
 547 **Data retrieval** Operations to obtain the current population in each state, and  
 548 to retrieve the runtime population history of each state and pathogen are also  
 549 included. These can be easily transformed into R data frames, for example, for  
 550 further analysis.

551  
 552 Scripting can be deployed using either one of the two on-board script in-  
 553 terpreter interfaces, or remotely from another platform using drivers provided  
 554 with the simulator. The remote drivers use an operating system channel called  
 555 *named pipes* or *fifo*s that are part of all MacOS, Windows, Linux, and other  
 556 Unix<sup>TM</sup>-based systems.

557 On our main dashboard, we provide two scripting windows that are opened  
 558 using the “S On” and “JS On” buttons (see button second and third from left at  
 559 bottom of Fig. 2A). The former allows the user to write simulation driver scripts  
 560 directly as command strings. (The commands listed in Fig. B.3 are accessed  
 561 by pressing the “Command Reference” button in the “S On” window.) This  
 562 window is used primarily to test and monitor scripts intended to be deployed on  
 563 a remote platform. The JS window contains a Nashorn Javascript interpreter  
 564 enhanced to accept and execute BPL operations. Scripts can developed, saved,  
 565 and used to drive the simulator from this interpreter. For example, Fig. B.4, lists  
 566 the code used to implement the adaptive vaccination programs. The SEIV object  
 567 referenced in this code contains methods corresponding to the BPL operations  
 568 detailed in Fig. B.3.

Table B1: Airport codes for parameter and variables used in the model algorithm

| Name                     | Math           | Code | Name                     | Math                               | Code |
|--------------------------|----------------|------|--------------------------|------------------------------------|------|
| <i>Epidemic codes</i>    |                |      |                          |                                    |      |
| % mortality              | $p_\alpha$     | MOR  | transmission             | $\beta$                            | XMT  |
| env. persist.            | $\eta$         | PST  | within-host replication  | $\lambda$                          | INV  |
| median latent period     | $\sigma_E$     | MLP  | median infectious period | $\sigma_I$                         | MIP  |
| population size          | $N_0$          | POP  | contact rate             | $\bar{\kappa}$                     | CPT  |
| mutation rate            | $\mu$          | MUR  | abruptness of waning     | $\sigma$                           | AOW  |
| cross immunity           | $c$            | CIM  | waning half-life         | $t^{\text{half}}$                  | WHA  |
| seas. trans. perturb     | $\delta$       | STP  | seas. trans. shift       | $\theta$                           | STS  |
| seas. trans. period      | $k$            | PER  | adap. contact param.     | $p_I^{\text{half}}$                | IPC  |
| strain entropy           | $J$            | ENT  | shedding rate            | $\zeta$                            | SHD  |
| <i>Vaccination codes</i> |                |      |                          |                                    |      |
| enable vaccination       |                | VEN  | vaccine on/off           | $t_v^{\text{on}}/t_v^{\text{off}}$ | VOO  |
| strain valency type      | VA#, #=1,...,4 |      | selection composition    |                                    | VCP  |
| vaccinate susc. only     |                | VSU  | vaccinate non-infectious |                                    | NVI  |
| vaccinate non-vacc.      |                | VNV  |                          |                                    |      |



## BPL Reference

### Commands

|                           |                                                                                                                                                                                                 |
|---------------------------|-------------------------------------------------------------------------------------------------------------------------------------------------------------------------------------------------|
| <b>reset</b>              | Resets simulation with initial slider/switch values.                                                                                                                                            |
| <b>restart</b>            | Resets simulation with current slider/switch values.                                                                                                                                            |
| <b>run_for T</b>          | Run the simulation from the current time for <i>T</i> steps.                                                                                                                                    |
| <b>run</b>                | Run the simulation for the number of steps set by the last <b>run_for</b> command.                                                                                                              |
| <b>step</b>               | Single-step the simulation one time unit.                                                                                                                                                       |
| <b>get time</b>           | Returns current simulation time.                                                                                                                                                                |
| <b>getLimit XXX</b>       | Returns lower and upper values of limit control labeled <i>XXX</i> on separate lines.                                                                                                           |
| <b>getPath XXX id</b>     | Returns value of parameter <i>XXX</i> in pathogen <i>id</i> .                                                                                                                                   |
| <b>get XXX</b>            | Returns value of non-limit control labeled <i>XXX</i> .                                                                                                                                         |
| <b>setLimit XXX lo hi</b> | Sets the limit control <i>XXX</i> to limits <i>lo hi</i> .                                                                                                                                      |
| <b>setPath XXX id Y</b>   | Sets value of parameter <i>XXX</i> in pathogen <i>id</i> to <i>Y</i> .                                                                                                                          |
| <b>set XXX Y</b>          | Sets value of non-limit control <i>XXX</i> to <i>Y</i> .                                                                                                                                        |
| <b>pathPop id Z</b>       | <i>id</i> is a pathogen id and <i>Z</i> must be one of the agent state identifiers (S, E, I, V, DI+, DD). Returns the current population in state <i>Z</i> with respect to pathogen <i>id</i> . |
| <b>totPop Z</b>           | <i>Z</i> must be one of the agent state identifiers (S, E, I, V, DI+, DD). Returns the total population in state <i>Z</i> .                                                                     |
| <b>timeTrail</b>          | Returns the array of timesteps for use in a table with other trail data.                                                                                                                        |
| <b>pathTrail id Z</b>     | <i>id</i> is a pathogen id and <i>Z</i> must be one of the agent state identifiers (S, E, I, V, DI+, DD). The population array for that pathogen and for that state over time is returned.      |
| <b>popTrail Z</b>         | <i>Z</i> must be one of the agent state identifiers (S, E, I, V, DI+, DD). The array of the entire population over time for that state is returned.                                             |
| <b>sleep T</b>            | NMBPL processor sleeps for <i>T</i> milliseconds.<br>(May be used for synchronization during longer simulations.)                                                                               |

### Notes

- Commands without explicit return do not return a value
- **get** and **set** use the 3-letter "airport codes" associated with each control
- Commands may be sequenced; e.g.

```
run_for 50 set XMT 1.5 run trail PATH I
```

will run for 50 timesteps, set the transmission parameter to 1.5, run for another 50, and return the 100 population values of I.

- Returned values are separated by newlines. When command sequences are sent remotely, left and right brackets (i.e. `\[` and `\]`) followed by newlines enclose the sequence of returned values, even if the sequence is empty; e.g.,

```
[\n50\n100\n1000\n]
```

- When using **trail**: if embedded in a command sequence, this must be the only command that returns a value (since the array returned by each of them will be embedded in the set of answers returned by the command sequence.)
- Use the console to test command sequences before using them remotely.
- Changes to the FIFOs, if saved to Preferences, will reappear in subsequent uses. Multiple instances of Numerus can run concurrently using different FIFOs.
- **Restart** button restarts the FIFO configuration.

Figure B.3: The list of Blackbox Programming Language (BPL) commands that can be used to write a simulation driver script, using the three-letter "airport codes" listed in Table A1 to access the parameters and variables in our coded algorithm. This list of commands can be accessed using the "Command Reference" button at the bottom of the Scripting Window.

## 569 R Integration

570 As previously mentioned, the API supports remote control of the simulator  
571 from independent platforms using the operating system's indigenous *fifo* chan-  
572 nels. Of particular interest is integration with the R statistical programming

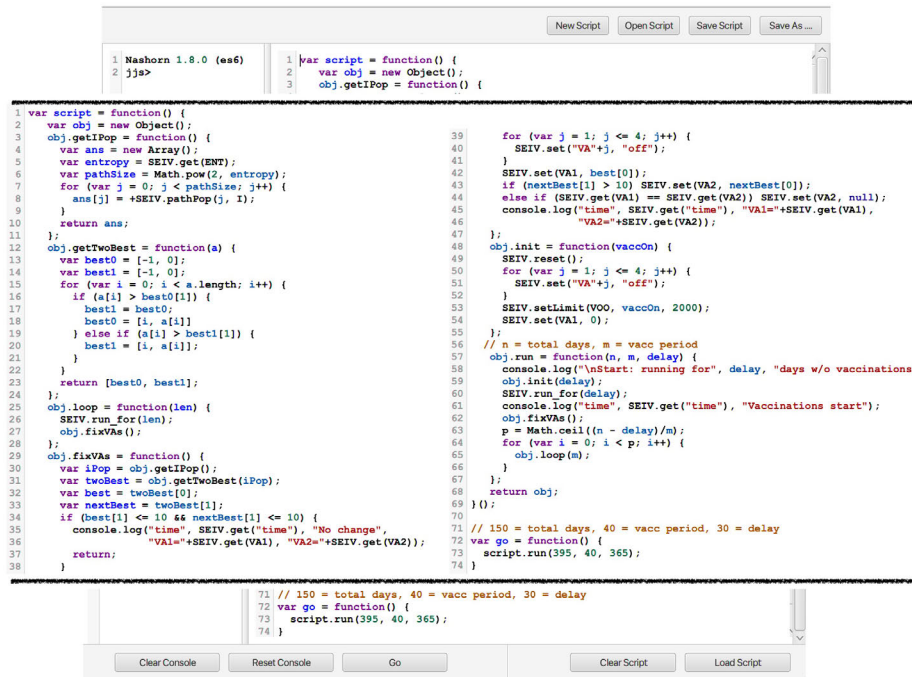

```
1 Nashorn 1.8.0 (es6)
2 jjs>
3
4
5
6
7
8
9
10
11
12
13
14
15
16
17
18
19
20
21
22
23
24
25
26
27
28
29
30
31
32
33
34
35
36
37
38
39
40
41
42
43
44
45
46
47
48
49
50
51
52
53
54
55
56
57
58
59
60
61
62
63
64
65
66
67
68
69
70
71
72
73
74
75
76
77
78
79
80
81
82
83
84
85
86
87
88
89
90
91
92
93
94
95
96
97
98
99
100
101
102
103
104
105
106
107
108
109
110
111
112
113
114
115
116
117
118
119
120
121
122
123
124
125
126
127
128
129
130
131
132
133
134
135
136
137
138
139
140
141
142
143
144
145
146
147
148
149
150
151
152
153
154
155
156
157
158
159
160
161
162
163
164
165
166
167
168
169
170
171
172
173
174
175
176
177
178
179
180
181
182
183
184
185
186
187
188
189
190
191
192
193
194
195
196
197
198
199
200
201
202
203
204
205
206
207
208
209
210
211
212
213
214
215
216
217
218
219
220
221
222
223
224
225
226
227
228
229
230
231
232
233
234
235
236
237
238
239
240
241
242
243
244
245
246
247
248
249
250
251
252
253
254
255
256
257
258
259
260
261
262
263
264
265
266
267
268
269
270
271
272
273
274
275
276
277
278
279
280
281
282
283
284
285
286
287
288
289
290
291
292
293
294
295
296
297
298
299
300
301
302
303
304
305
306
307
308
309
310
311
312
313
314
315
316
317
318
319
320
321
322
323
324
325
326
327
328
329
330
331
332
333
334
335
336
337
338
339
340
341
342
343
344
345
346
347
348
349
350
351
352
353
354
355
356
357
358
359
360
361
362
363
364
365
366
367
368
369
370
371
372
373
374
375
376
377
378
379
380
381
382
383
384
385
386
387
388
389
390
391
392
393
394
395
396
397
398
399
400
401
402
403
404
405
406
407
408
409
410
411
412
413
414
415
416
417
418
419
420
421
422
423
424
425
426
427
428
429
430
431
432
433
434
435
436
437
438
439
440
441
442
443
444
445
446
447
448
449
450
451
452
453
454
455
456
457
458
459
460
461
462
463
464
465
466
467
468
469
470
471
472
473
474
475
476
477
478
479
480
481
482
483
484
485
486
487
488
489
490
491
492
493
494
495
496
497
498
499
500
501
502
503
504
505
506
507
508
509
510
511
512
513
514
515
516
517
518
519
520
521
522
523
524
525
526
527
528
529
530
531
532
533
534
535
536
537
538
539
540
541
542
543
544
545
546
547
548
549
550
551
552
553
554
555
556
557
558
559
560
561
562
563
564
565
566
567
568
569
570
571
572
573
574
575
576
577
578
579
580
581
582
583
584
585
586
587
588
589
590
591
592
593
594
595
596
597
598
599
600
601
602
603
604
605
606
607
608
609
610
611
612
613
614
615
616
617
618
619
620
621
622
623
624
625
626
627
628
629
630
631
632
633
634
635
636
637
638
639
640
641
642
643
644
645
646
647
648
649
650
651
652
653
654
655
656
657
658
659
660
661
662
663
664
665
666
667
668
669
670
671
672
673
674
675
676
677
678
679
680
681
682
683
684
685
686
687
688
689
690
691
692
693
694
695
696
697
698
699
700
701
702
703
704
705
706
707
708
709
710
711
712
713
714
715
716
717
718
719
720
721
722
723
724
725
726
727
728
729
730
731
732
733
734
735
736
737
738
739
740
741
742
743
744
745
746
747
748
749
750
751
752
753
754
755
756
757
758
759
760
761
762
763
764
765
766
767
768
769
770
771
772
773
774
775
776
777
778
779
780
781
782
783
784
785
786
787
788
789
790
791
792
793
794
795
796
797
798
799
800
801
802
803
804
805
806
807
808
809
810
811
812
813
814
815
816
817
818
819
820
821
822
823
824
825
826
827
828
829
830
831
832
833
834
835
836
837
838
839
840
841
842
843
844
845
846
847
848
849
850
851
852
853
854
855
856
857
858
859
860
861
862
863
864
865
866
867
868
869
870
871
872
873
874
875
876
877
878
879
880
881
882
883
884
885
886
887
888
889
890
891
892
893
894
895
896
897
898
899
900
901
902
903
904
905
906
907
908
909
910
911
912
913
914
915
916
917
918
919
920
921
922
923
924
925
926
927
928
929
930
931
932
933
934
935
936
937
938
939
940
941
942
943
944
945
946
947
948
949
950
951
952
953
954
955
956
957
958
959
960
961
962
963
964
965
966
967
968
969
970
971
972
973
974
975
976
977
978
979
980
981
982
983
984
985
986
987
988
989
990
991
992
993
994
995
996
997
998
999
1000
```

Figure B.4: The JS scripting window accessed by selecting the “JS On” button in the main dashboard (see button second from left at bottom of Fig. 2A). The script shown here was used to execute the adaptive vaccination strategy discussed in the main text.

573 environment. An R-package called “seiv” acts as a driver by synchronously is-  
574 suing BPL command strings and waiting for results. Consequently, a simulation  
575 can be driven entirely from within the R platform, treating the simulator as a  
576 “virtual package”.

577 Fig. B.5 shows the code used to run the simulator multiple times with dif-  
578 ferent random number generator seeds. Following each run, the time history of  
579 the population in the I, DI+ and DD states is extracted directly to an R data  
580 frame (without the need to save, for example, in a comma-separated list). At  
581 the end of the run sequence the data frame is used to build the plots shown in  
582 Fig. C.2.

583 R could be used in a more direct way by analyzing data at various points  
584 throughout a single run and adjusting parameters programmatically, similar to  
585 the adaptive vaccination strategy carried out in Javascript, only taking advan-  
586 tage of the R environment’s powerful toolkit.

```
1 library("seiv")
2 library(ggplot2)
3 library(reshape)
4
5 execSEIVRemote <- function(seed=0, sampleSize=165, ...) {
6   who = list(...)
7   if (length(who) == 0) who = list("I", "DI+", "DD")
8   seivdispatch(paste("reset set RSD", seed, "run_for", sampleSize))
9   time <- 0:(sampleSize)
10  ans <- data.frame("Time"=time)
11  top <- sampleSize+1
12  for (z in who) {
13    nxt <- seivdispatch(paste("popTrail", z))
14    if (length(nxt) < top) nxt = c(nxt, integer(top-length(nxt)))
15    ans = cbind(ans, nxt)
16    names(ans)[length(names(ans))] = z
17  }
18  ans
19 }
20
21 multiSEIV <- function(runs=3, sampleSize=165) {
22   ans = list()
23   time <- 0:(sampleSize)
24   for (m in 1:3) ans[[m]] = data.frame("Time" = time)
25   for (n in 1:runs) {
26     print(n)
27     dat <- execSEIVRemote(n-1, sampleSize, "I", "DI+", "DD")
28     who <- c("I", "DI+", "DD")
29     for (m in 1:3) {
30       ans[[m]] = cbind(ans[[m]], dat[,c(m-1)])
31       names(ans[[m]][length(names(ans[[m]])]) = paste(who[m], "Run", n)
32     }
33   }
34   ans
35 }
36
37 buildMSFrame <- function(l) {
38   means = numeric()
39   stds = numeric()
40   for (m in 1:nrow(l)) {
41     smpl = as.numeric(l[m,2:ncol(l)])
42     means[m] = mean(smpl)
43     stds[m] = sqrt(var(smpl))
44   }
45   data.frame("Time"=l[,1], "μ"=means, "σ"=stds,
46             "μ-σ"=means-stds, check.names=FALSE)
47 }
48
49 buildGraph <- function(l, title) {
50   msFrame <- buildMSFrame(l)
51   molten = melt(msFrame, id.vars="Time")
52   ggplot(molten, aes(x=Time, y=value, col=variable)) +
53     geom_line() +
54     xlab("Day") +
55     ylab("Population") +
56     ggtitle(title)
57 }
58
59 go <- function(runs=30, sampleSize=165) {
60   data <- multiSEIV(runs, sampleSize)
61   list (
62     buildGraph(data[[1]], "Prevalence"),
63     buildGraph(data[[2]], "Incidence"),
64     buildGraph(data[[3]], "Daily Deaths")
65   )
66 }
```

R driver used to integrate SEIV-IBM J-RAMP into runs to generate plots

Figure B.5: Our SEIVD-IBM can be treated as an R-package called “seiv” and run as such in conjunction with other packages, such as ggplot2 and reshape to conduct multiple simulations and then carry out data and statistical analyses of the simulation results. The code shown here was used to produce the plots illustrated in Fig. C.2.

587 **C Additional Figures**

|                 | <b>N=10,000</b> |              |              |            |              | <b>N=30,000</b> |              |              |            |              |
|-----------------|-----------------|--------------|--------------|------------|--------------|-----------------|--------------|--------------|------------|--------------|
| <b>Run seed</b> | <b>S fnl</b>    | <b>V fnl</b> | <b>Total</b> | <b>D</b>   | <b>t fnl</b> | <b>S fnl</b>    | <b>V fnl</b> | <b>Total</b> | <b>D</b>   | <b>t fnl</b> |
| <b>0</b>        | 2135            | 7700         | 165          | 166        |              | 6574            | 22964        | 462          | 212        |              |
| <b>1</b>        | 2234            | 7522         | 144          | 171        |              | 6431            | 23067        | 502          | 193        |              |
| <b>2</b>        | 2252            | 7602         | 146          | 158        |              | 6516            | 23020        | 464          | 175        |              |
| <b>3</b>        | 2174            | 7668         | 158          | 188        |              | 6568            | 22958        | 474          | 220        |              |
| <b>4</b>        | 2154            | 7684         | 162          | 162        |              | 6345            | 23214        | 441          | 191        |              |
| <b>5</b>        | 2127            | 7706         | 167          | 165        |              | 6520            | 22998        | 482          | 196        |              |
| <b>6</b>        | 2166            | 7662         | 172          | 159        |              | 6604            | 22950        | 446          | 198        |              |
| <b>7</b>        | 2280            | 7573         | 147          | 171        |              | 6282            | 23250        | 468          | 197        |              |
| <b>8</b>        | 2254            | 7613         | 133          | 161        |              | 6339            | 23184        | 477          | 187        |              |
| <b>9</b>        | 2153            | 7681         | 166          | 169        |              | 6529            | 23050        | 421          | 201        |              |
| <b>Mean</b>     | <b>2193</b>     | <b>7641</b>  | <b>156</b>   | <b>167</b> |              | <b>6471</b>     | <b>23066</b> | <b>464</b>   | <b>197</b> |              |
| <b>SD</b>       | <b>56</b>       | <b>61</b>    | <b>13</b>    | <b>9</b>   |              | <b>114</b>      | <b>112</b>   | <b>23</b>    | <b>13</b>  |              |
| <b>Mean %</b>   | 0.219           | 0.764        | 0.0156       |            |              | 0.216           | 0.769        | 0.0155       |            |              |
| <b>SD %</b>     | 0.006           | 0.006        | 0.0013       |            |              | 0.004           | 0.004        | 0.0008       |            |              |

Figure C.1: The final sizes of the uninfected ( $S(t_{\text{fnl}})$  individuals), infected ( $V(t_{\text{fnl}})$  individuals) and dead ( $D(t_{\text{fnl}})$  individuals) classes and the length of the epidemic ( $t_{\text{fnl}}$  days) are provided here, together with summary statistics, for 10 simulations (runtime seed ranges from 0 to 9) in each case when the initial population sizes are  $N_0 = 10,000$  and  $N_0 = 30000$  individuals respectively. The parameter values used are otherwise the same as those used to produce the simulation depicted in Fig. 2 in the main text.

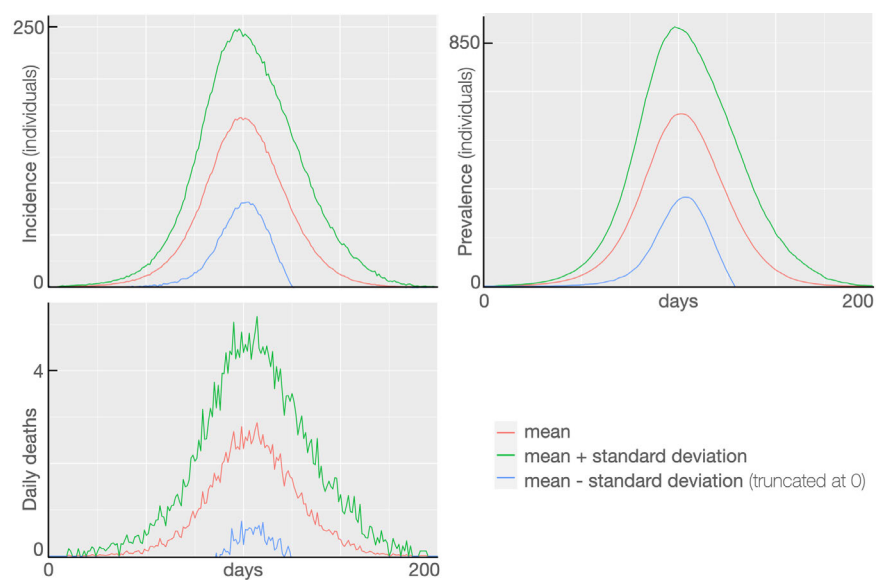

Figure C.2: Plots of the mean (red)  $\pm$  1 standard deviation green and blue, the latter truncated at 0) of prevalence, incidence, and daily deaths for 100 runs (runtime seeds = 0,...,99) using the same parameter set used to produce the individual run (runtime seed = 0) depicted in Fig. 2 in the main text (also see Fig. C.1). These figures were produced by running our SEIVD-IBM J-RAMP as an R-package as described in Appendix B, with the code documented in Fig. B.5.

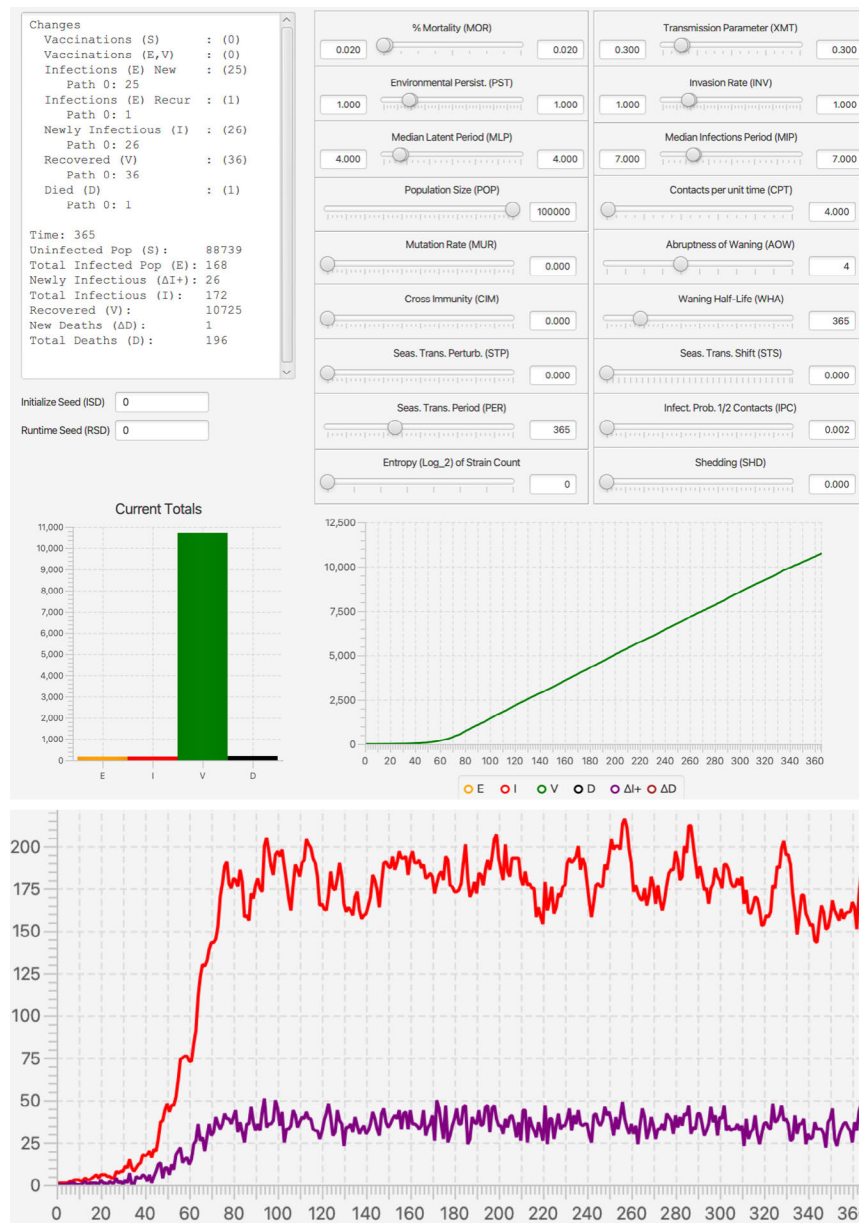

Figure C.3: If, together with our basic set of parameters (Table 1), we set  $p_1^{\text{half}} = 0.005$  then the total number of individuals that have been infected (disease class  $V$ ) at the end of one year is  $10027/100,000 \approx 10\%$ .

| Strain | beta  | Strain | beta  | Strain | beta  | Strain | beta  | Strain | beta  | Strain | beta  | Strain | beta  |
|--------|-------|--------|-------|--------|-------|--------|-------|--------|-------|--------|-------|--------|-------|
| 0      | 0.300 | 16     | 0.149 | 32     | 0.246 | 48     | 0.295 | 64     | 0.235 | 80     | 0.152 | 96     | 0.196 |
| 1      | 0.325 | 17     | 0.097 | 33     | 0.244 | 49     | 0.076 | 65     | 0.121 | 81     | 0.127 | 97     | 0.172 |
| 2      | 0.007 | 18     | 0.117 | 34     | 0.011 | 50     | 0.289 | 66     | 0.249 | 82     | 0.138 | 98     | 0.177 |
| 3      | 0.350 | 19     | 0.089 | 35     | 0.029 | 51     | 0.155 | 67     | 0.079 | 83     | 0.019 | 99     | 0.165 |
| 4      | 0.252 | 20     | 0.222 | 36     | 0.162 | 52     | 0.043 | 68     | 0.133 | 84     | 0.258 | 100    | 0.037 |
| 5      | 0.217 | 21     | 0.292 | 37     | 0.214 | 53     | 0.110 | 69     | 0.127 | 85     | 0.181 | 101    | 0.087 |
| 6      | 0.105 | 22     | 0.222 | 38     | 0.102 | 54     | 0.263 | 70     | 0.136 | 86     | 0.042 | 102    | 0.230 |
| 7      | 0.375 | 23     | 0.214 | 39     | 0.036 | 55     | 0.049 | 71     | 0.184 | 87     | 0.284 | 103    | 0.096 |
| 8      | 0.214 | 24     | 0.205 | 40     | 0.010 | 56     | 0.037 | 72     | 0.166 | 88     | 0.218 | 104    | 0.219 |
| 9      | 0.256 | 25     | 0.100 | 41     | 0.173 | 57     | 0.108 | 73     | 0.015 | 89     | 0.249 | 105    | 0.058 |
| 10     | 0.217 | 26     | 0.089 | 42     | 0.093 | 58     | 0.201 | 74     | 0.048 | 90     | 0.025 | 106    | 0.033 |
| 11     | 0.151 | 27     | 0.026 | 43     | 0.256 | 59     | 0.041 | 75     | 0.131 | 91     | 0.052 | 107    | 0.219 |
| 12     | 0.009 | 28     | 0.296 | 44     | 0.236 | 60     | 0.159 | 76     | 0.013 | 92     | 0.160 | 108    | 0.151 |
| 13     | 0.077 | 29     | 0.065 | 45     | 0.038 | 61     | 0.053 | 77     | 0.207 | 93     | 0.121 | 109    | 0.005 |
| 14     | 0.026 | 30     | 0.019 | 46     | 0.186 | 62     | 0.186 | 78     | 0.019 | 94     | 0.234 | 110    | 0.110 |
| 15     | 0.400 | 31     | 0.425 | 47     | 0.078 | 63     | 0.450 | 79     | 0.149 | 95     | 0.165 | 111    | 0.214 |
|        |       |        |       |        |       |        |       |        |       |        |       | 127    | 0.475 |

Figure C.4: This is the set of strain transmission parameter values  $\beta_j, j = 0, \dots, 127$  used in our 128 strain simulation. Note strains 0, 1, 3, 7, 15, 63, 127 (light blue cells) are part of a dominating sequence of values increasing steadily in steps of 0.025 from  $\beta_0 = 0.30$  to  $\beta_{127} = 0.475$  along the one-step-neighborhood pathway represented by the allele structures  $(0,0,0,0,0,0), (0,0,0,0,0,1), (0,0,0,0,0,1,1), \dots, (1,1,1,1,1,1,1)$ . All the remaining  $\beta$  values were generated at random on the interval  $[0, 0.3]$ .



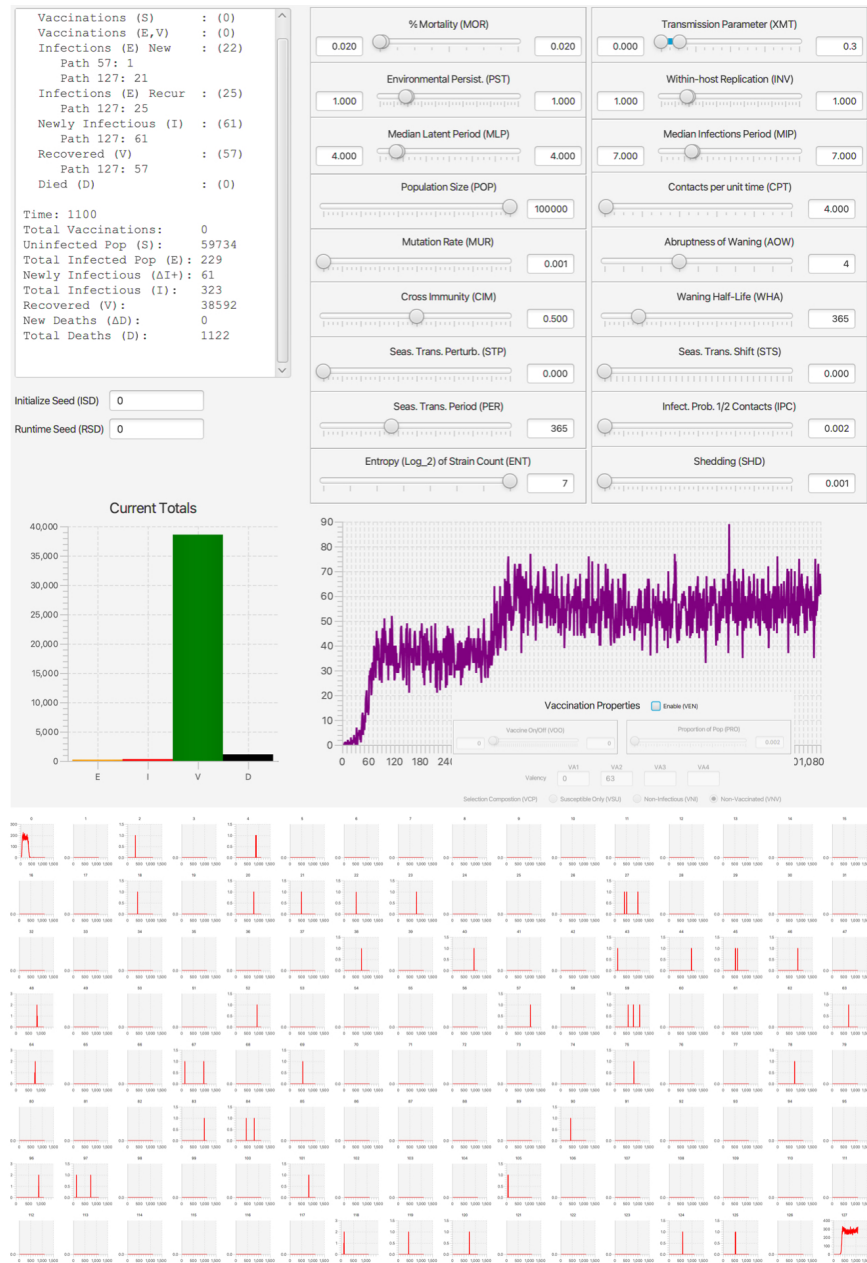

Figure C.5: This is a baseline 3-year no vaccination run for our 128-strain vaccination study with strain-specific transmission values depicted in Fig. C.4 and other parameter values as indicated on the dashboard (also see Table 1). See Fig. 6 in main text for enlarged plots of predominant strains.

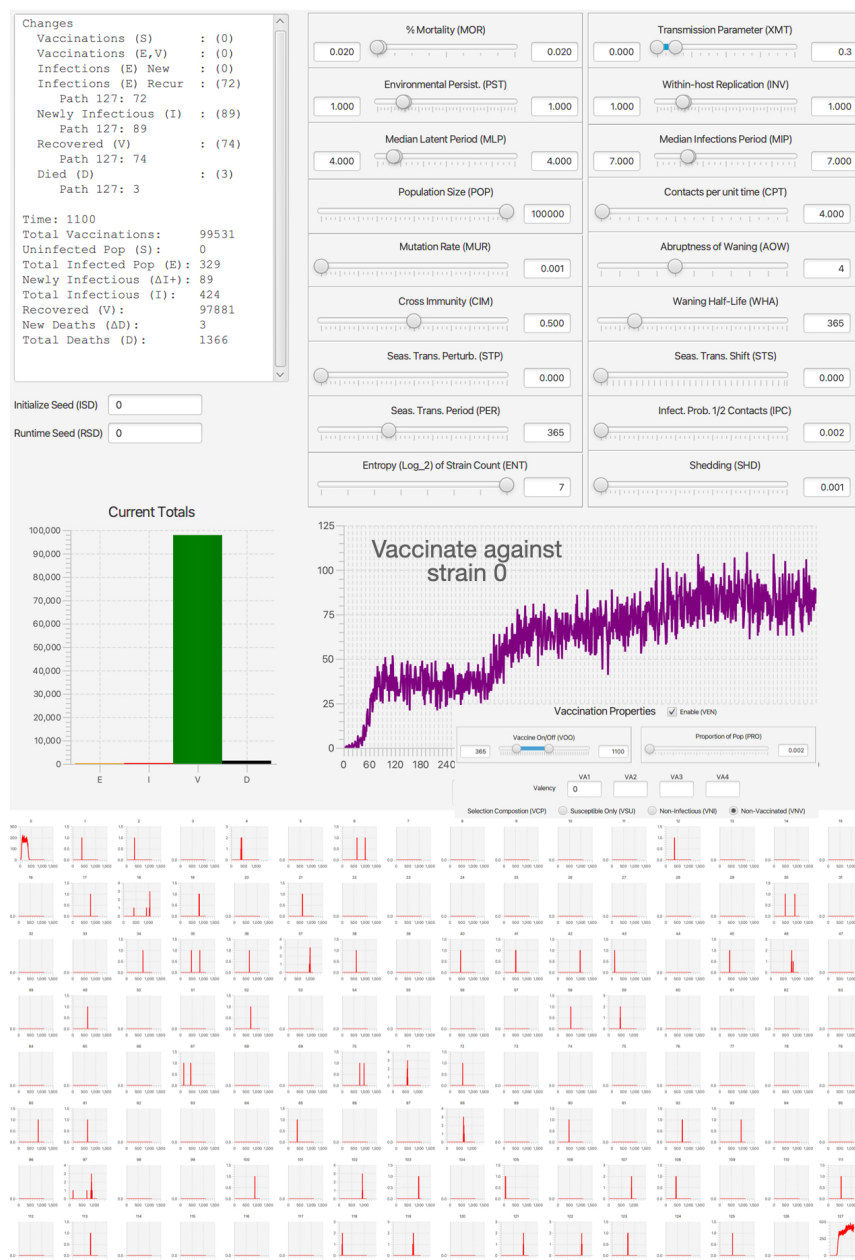

Figure C.6: This is vaccination in years 2 and 3 against strain 0 at the rate of 0.2% of the population per day in our 128-strain vaccination study with strain-specific transmission values depicted in Fig. C.4 and other parameter values as indicated on the dashboard (also see Table 1). See Fig. 6 in main text for enlarged plots of predominant strains.

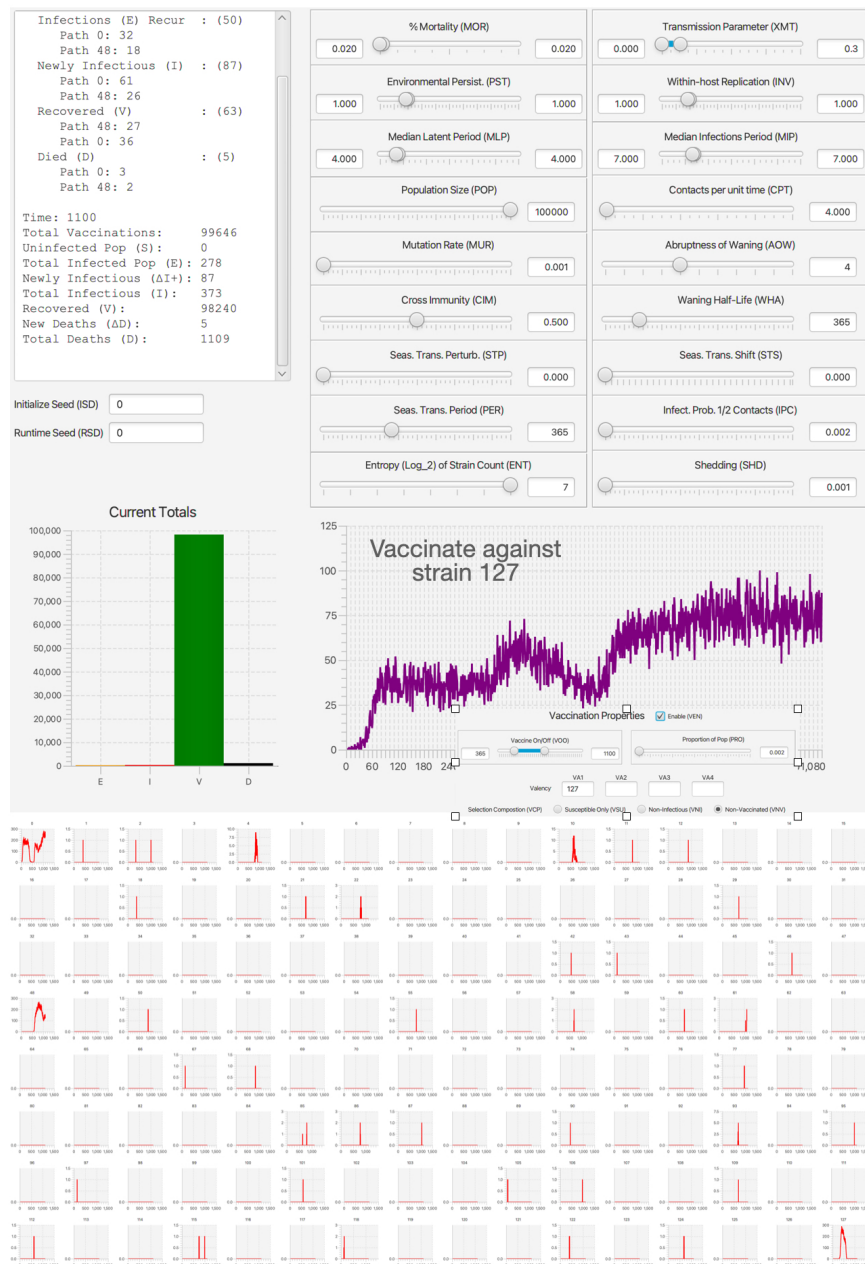

Figure C.7: This is vaccination in years 2 and 3 against strain 127 at the rate of 0.2% of the population per day in our 128-strain vaccination study with strain-specific transmission values depicted in Fig. C.4 and other parameter values as indicated on the dashboard (also see Table 1). See Fig. 6 in main text for enlarged plots of predominant strains.

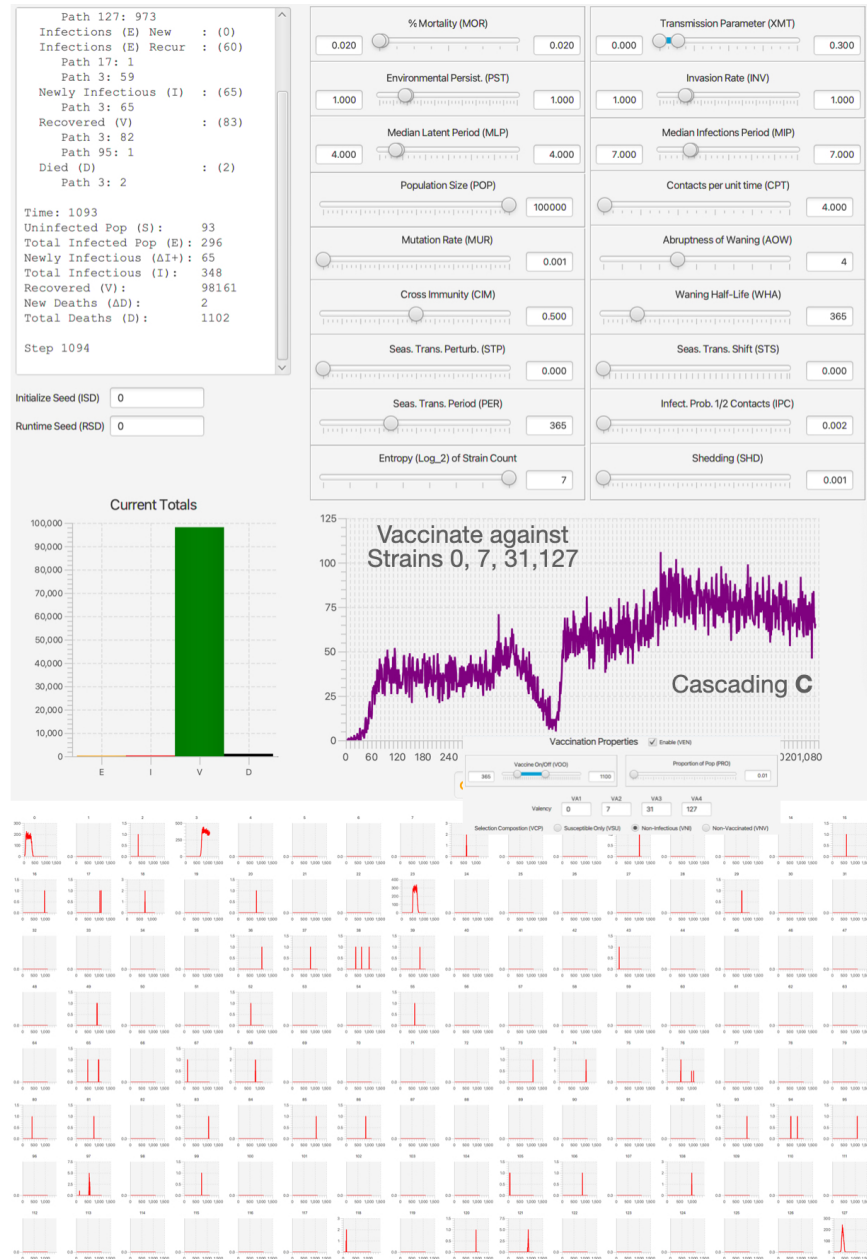

Figure C.8: This is a multivalent vaccination in years 2 and 3 against strains 0, 7, 31 and 127 at the rate of 1.0% of the population per day in our 128-strain vaccination study with strain-specific transmission values depicted in Fig. C.4 and other parameter values as indicated on the dashboard (also see Table 1), except that the cross immunity matrix  $C$  is now defined by Eq. A.7. See Fig. 6 in main text for enlarged plots of predominant strains.

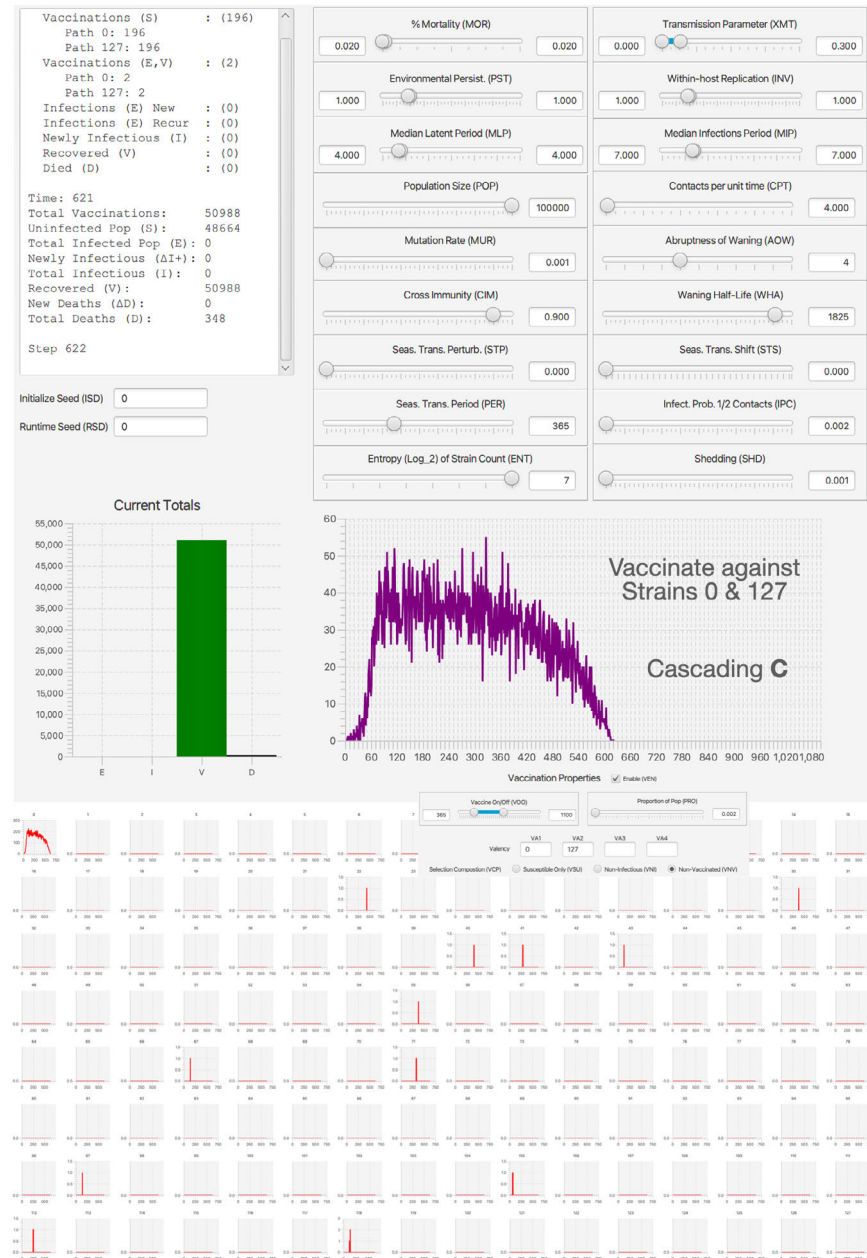

Figure C.9: This is a bivalent vaccination in years 2 and 3 against strains 0 and 127 at the rate of 0.2% of the population per day in our 128-strain vaccination study with strain-specific transmission values depicted in Fig. C.4 and other parameter values as indicated on the dashboard (also see Table 1), except that the half-waning values has been increased fivefold  $t^{\text{half}} = 1825$  days the cross immunity matrix  $\mathbf{C}$  is now defined by Eq. A.7 with  $c = 0.9$ . See Fig. 6 in main text for enlarged plots of the predominant strain 0.
